# Supplementary material for: Glycogen synthase kinase 3 drives thymocyte egress by suppressing β-catenin activation of Akt
Source: PubMed Central journal article supplement — Sci Adv. 2021 Oct 8;7(41):eabg6262. doi: 10.1126/sciadv.abg6262 (PMC8500522; doi:10.1126/sciadv.abg6262), 2021-10-08
Supplement: sciadv.abg6262_sm.pdf [file sciadv.abg6262_sm.pdf]

Supplementary Materials for

**Glycogen synthase kinase 3 drives thymocyte egress by suppressing  
 $\beta$ -catenin activation of Akt**

Chenfeng Liu, Lei Ma, Yuxuan Wang, Jiayi Zhao, Pengda Chen, Xian Chen, Yingxin Wang, Yanyan Hu, Yun Liu, Xian Jia, Zhanghua Yang, Xingzhi Yin, Jianfeng Wu, Suqin Wu, Haiping Zheng, Xiaohong Ma, Xiufeng Sun, Ying He, Lianghua Lin, Yubing Fu, Kunyu Liao, Xiaojuan Zhou, Shan Jiang, Guofeng Fu, Jian Tang, Wei Han, Xiao Lei Chen, Wenzhu Fan, Yazhen Hong, Jiahuai Han, Xiangyang Huang, Bo-An Li, Nengming Xiao, Changchun Xiao\*, Guo Fu\*, Wen-Hsien Liu\*

\*Corresponding author. Email: whliu@xmu.edu.cn (W.-H.L.); guofu@xmu.edu.cn (G.F.); cxiao@xmu.edu.cn (C.X.)

Published 8 October 2021, *Sci. Adv.* 7, eabg6262 (2021)  
DOI: 10.1126/sciadv.abg6262

**This PDF file includes:**

Figs. S1 to S15

Fig. S1

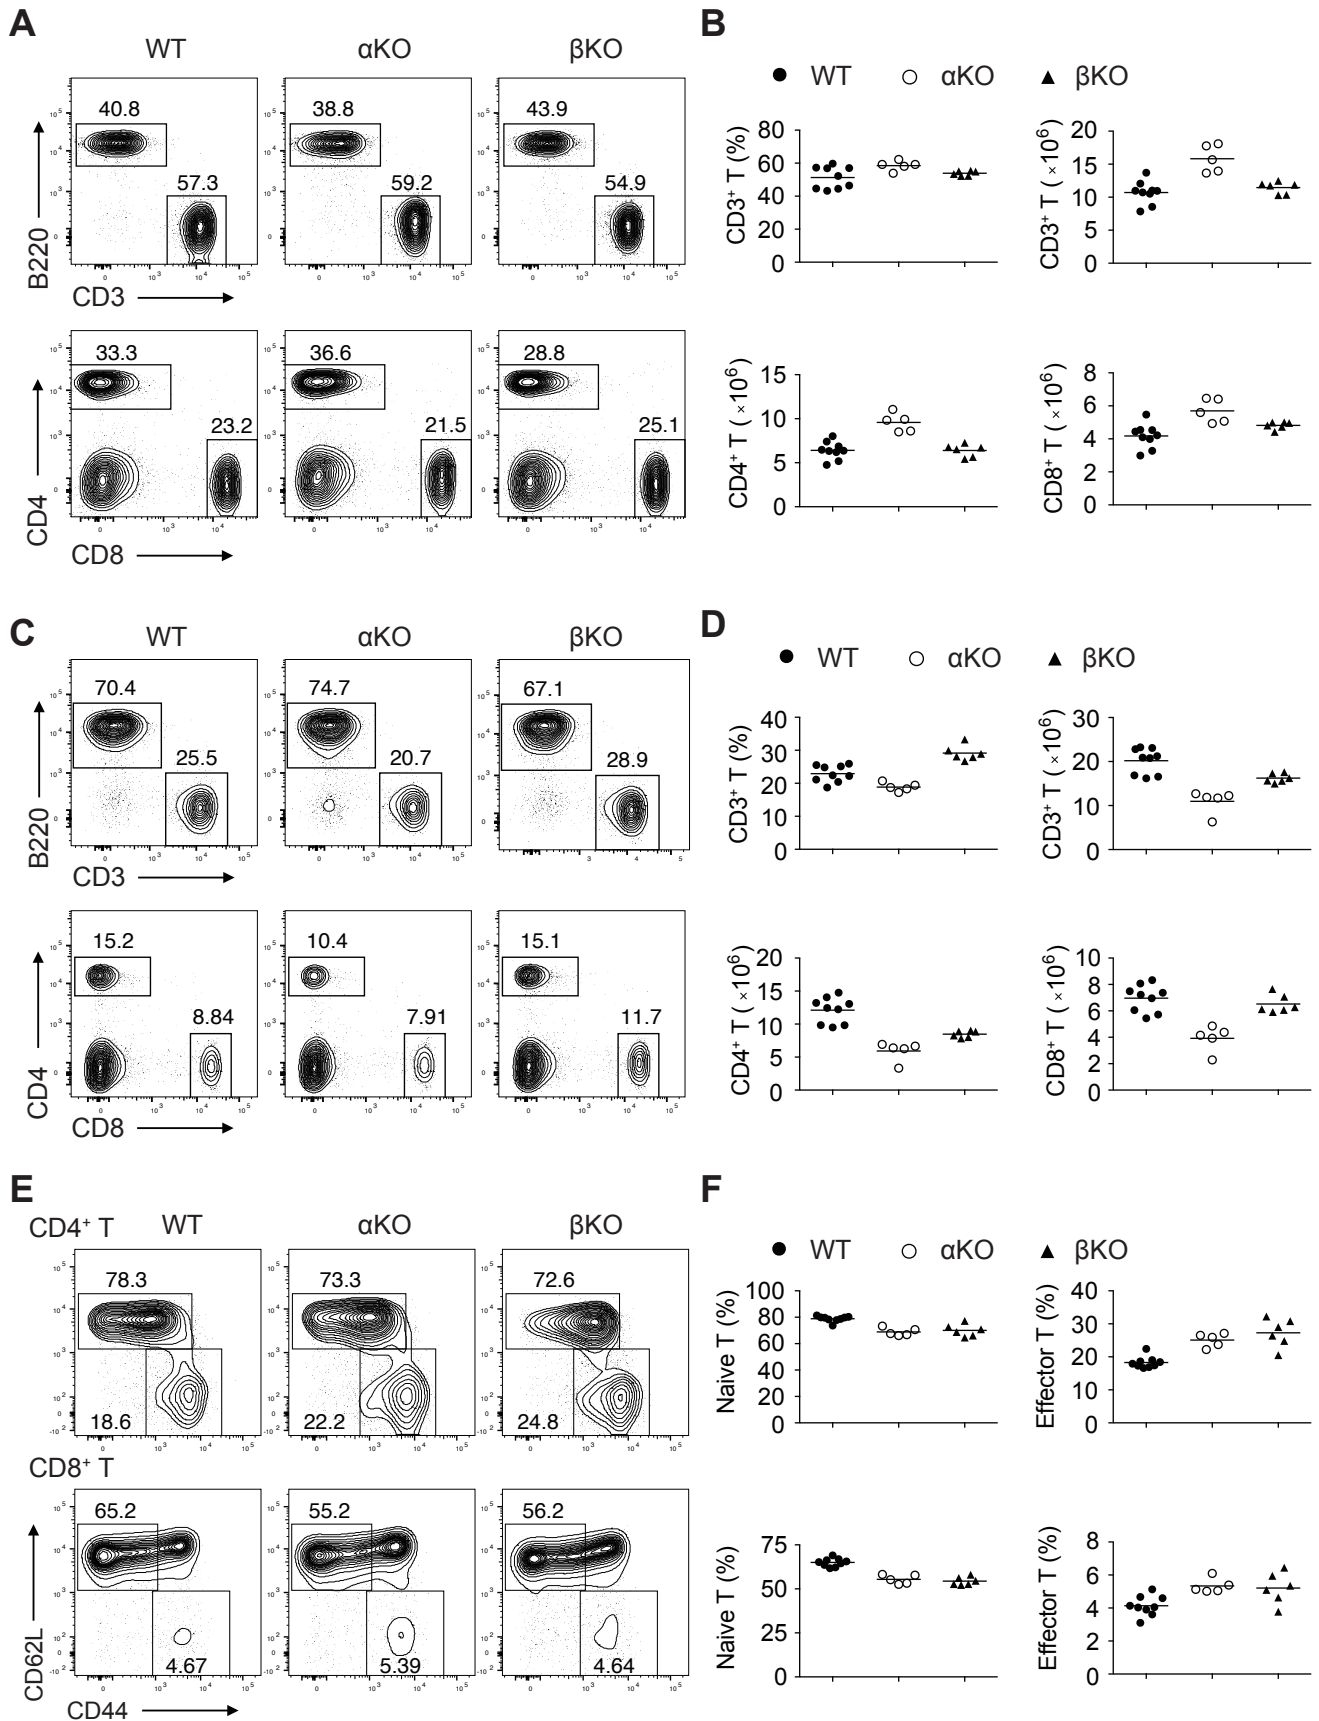

**Fig. S1. Normal peripheral T cell compartments in *Gsk3 $\alpha$* <sup>-/-</sup> and *Gsk3 $\beta$* <sup>-/-</sup> mice**

(A-D) Flow cytometry analysis of CD3<sup>+</sup> T and B220<sup>+</sup> B cells (upper), CD4<sup>+</sup> and CD8<sup>+</sup> T cells (lower) in the lymph nodes (A and B) and spleen (C and D) of 4-6 week-old WT, *Gsk3 $\alpha$* <sup>-/-</sup>( $\alpha$ KO) and *Gsk3 $\beta$* <sup>-/-</sup>( $\beta$ KO) mice. (A and C) Representative FACS plots. (B and D) Summary of the percentage and number of CD3<sup>+</sup>TCR $\beta$ <sup>+</sup> (upper) and CD4<sup>+</sup> and CD8<sup>+</sup> T cells (lower) in the lymph nodes (B) and spleen (D) (n $\geq$ 5 per group). (E and F) Flow cytometry analysis of naive (CD62L<sup>+</sup>CD44<sup>-</sup>) and activated (CD62L<sup>-</sup>CD44<sup>+</sup>) T cells among CD4<sup>+</sup> (upper) and CD8<sup>+</sup> T cells (lower) in the spleen of WT,  $\alpha$ KO and  $\beta$ KO mice. (E) Representative FACS plots. (F) Summary of the percentages of naive and activated T cells. Each symbol represents an individual mouse; small horizontal lines indicate the mean ( $\pm$  s.e.m.). Data are representative of at least two independent experiments.

Fig. S2

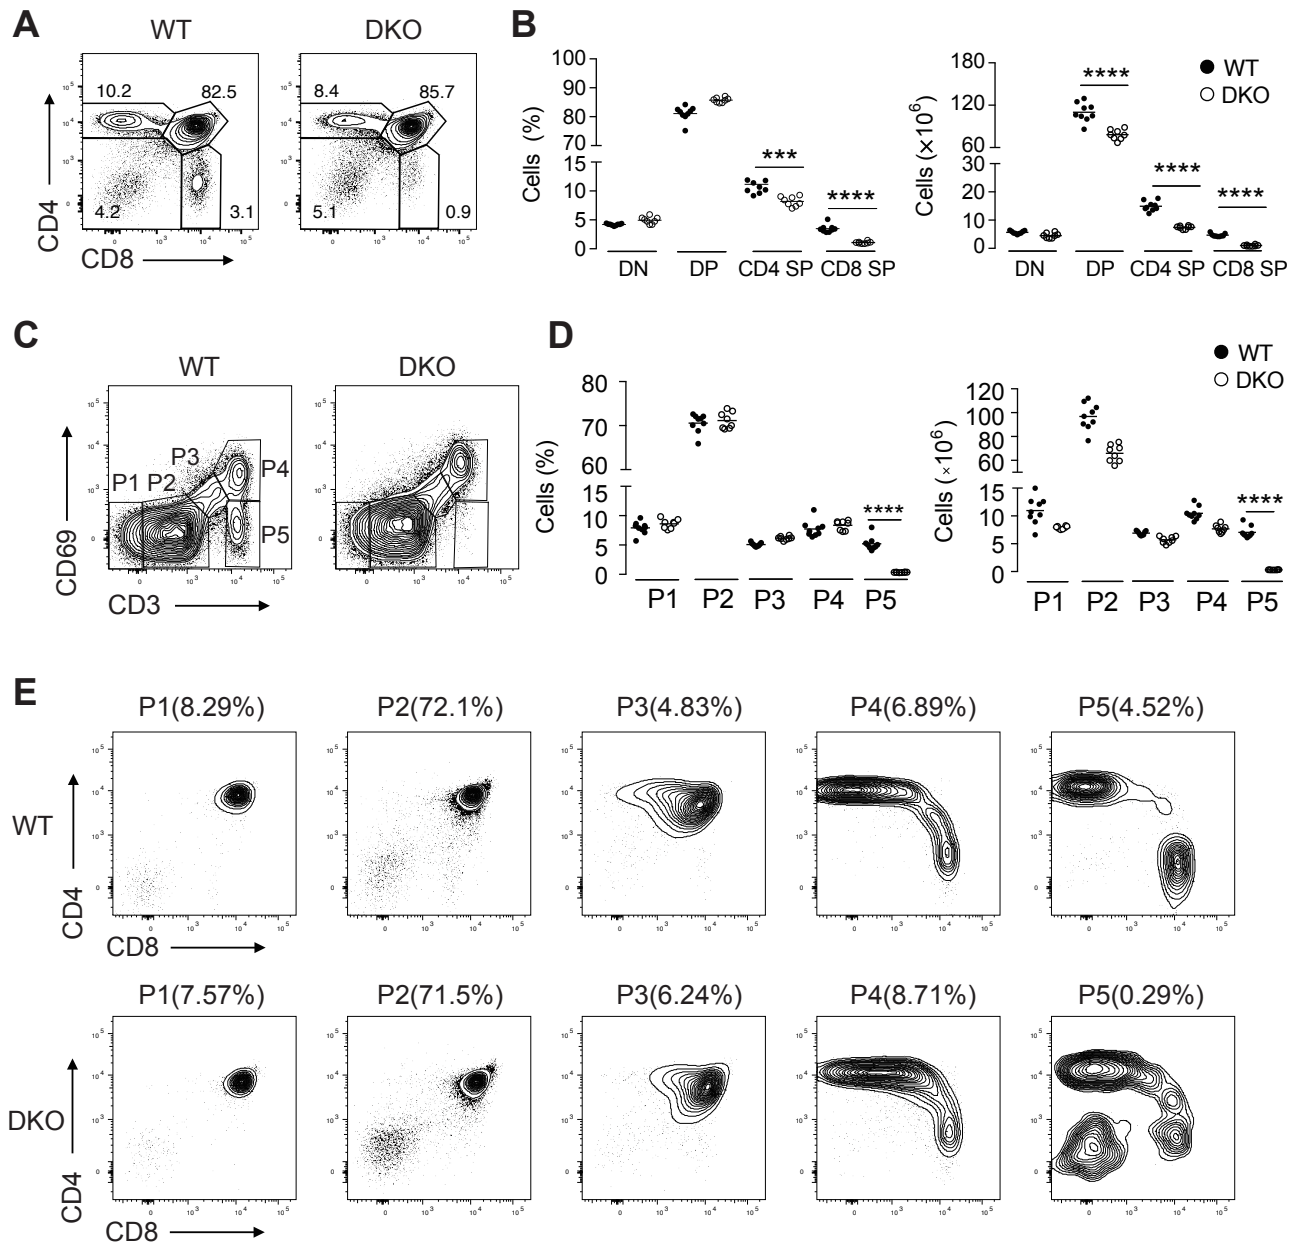

**Fig. S2. Thymocyte development in *Gsk3 $\alpha$* <sup>-/-</sup>*b*<sup>-/-</sup> mice**

(A) Flow cytometry analysis of thymocytes from 4-6 week-old WT and DKO mice. (B) Percentage and number of DN, DP, CD4<sup>+</sup> and CD8<sup>+</sup> SP populations from (A) (n $\geq$ 8 per group). (C-E) Thymocytes from WT and DKO mice were divided into five subpopulations (P1-P5) based on CD3 and CD69 expression (C and D). These subpopulations were further examined for CD4 and CD8 expression (E). (C and E) Representative FACS plots. (D) Summary of the percentage and number of P1-P5 subpopulations in WT and DKO mice (n $\geq$ 4 per group). Note that DKO mice lack the P5 subpopulation, which are mature SP thymocytes ready for emigration from the thymus. Each symbol represents an individual mouse. Small horizontal lines indicate the mean ( $\pm$  s.e.m.). \*\*\*, P < 0.001; \*\*\*\*, P < 0.0001. Data are representative of at least three independent experiments.

Fig. S3

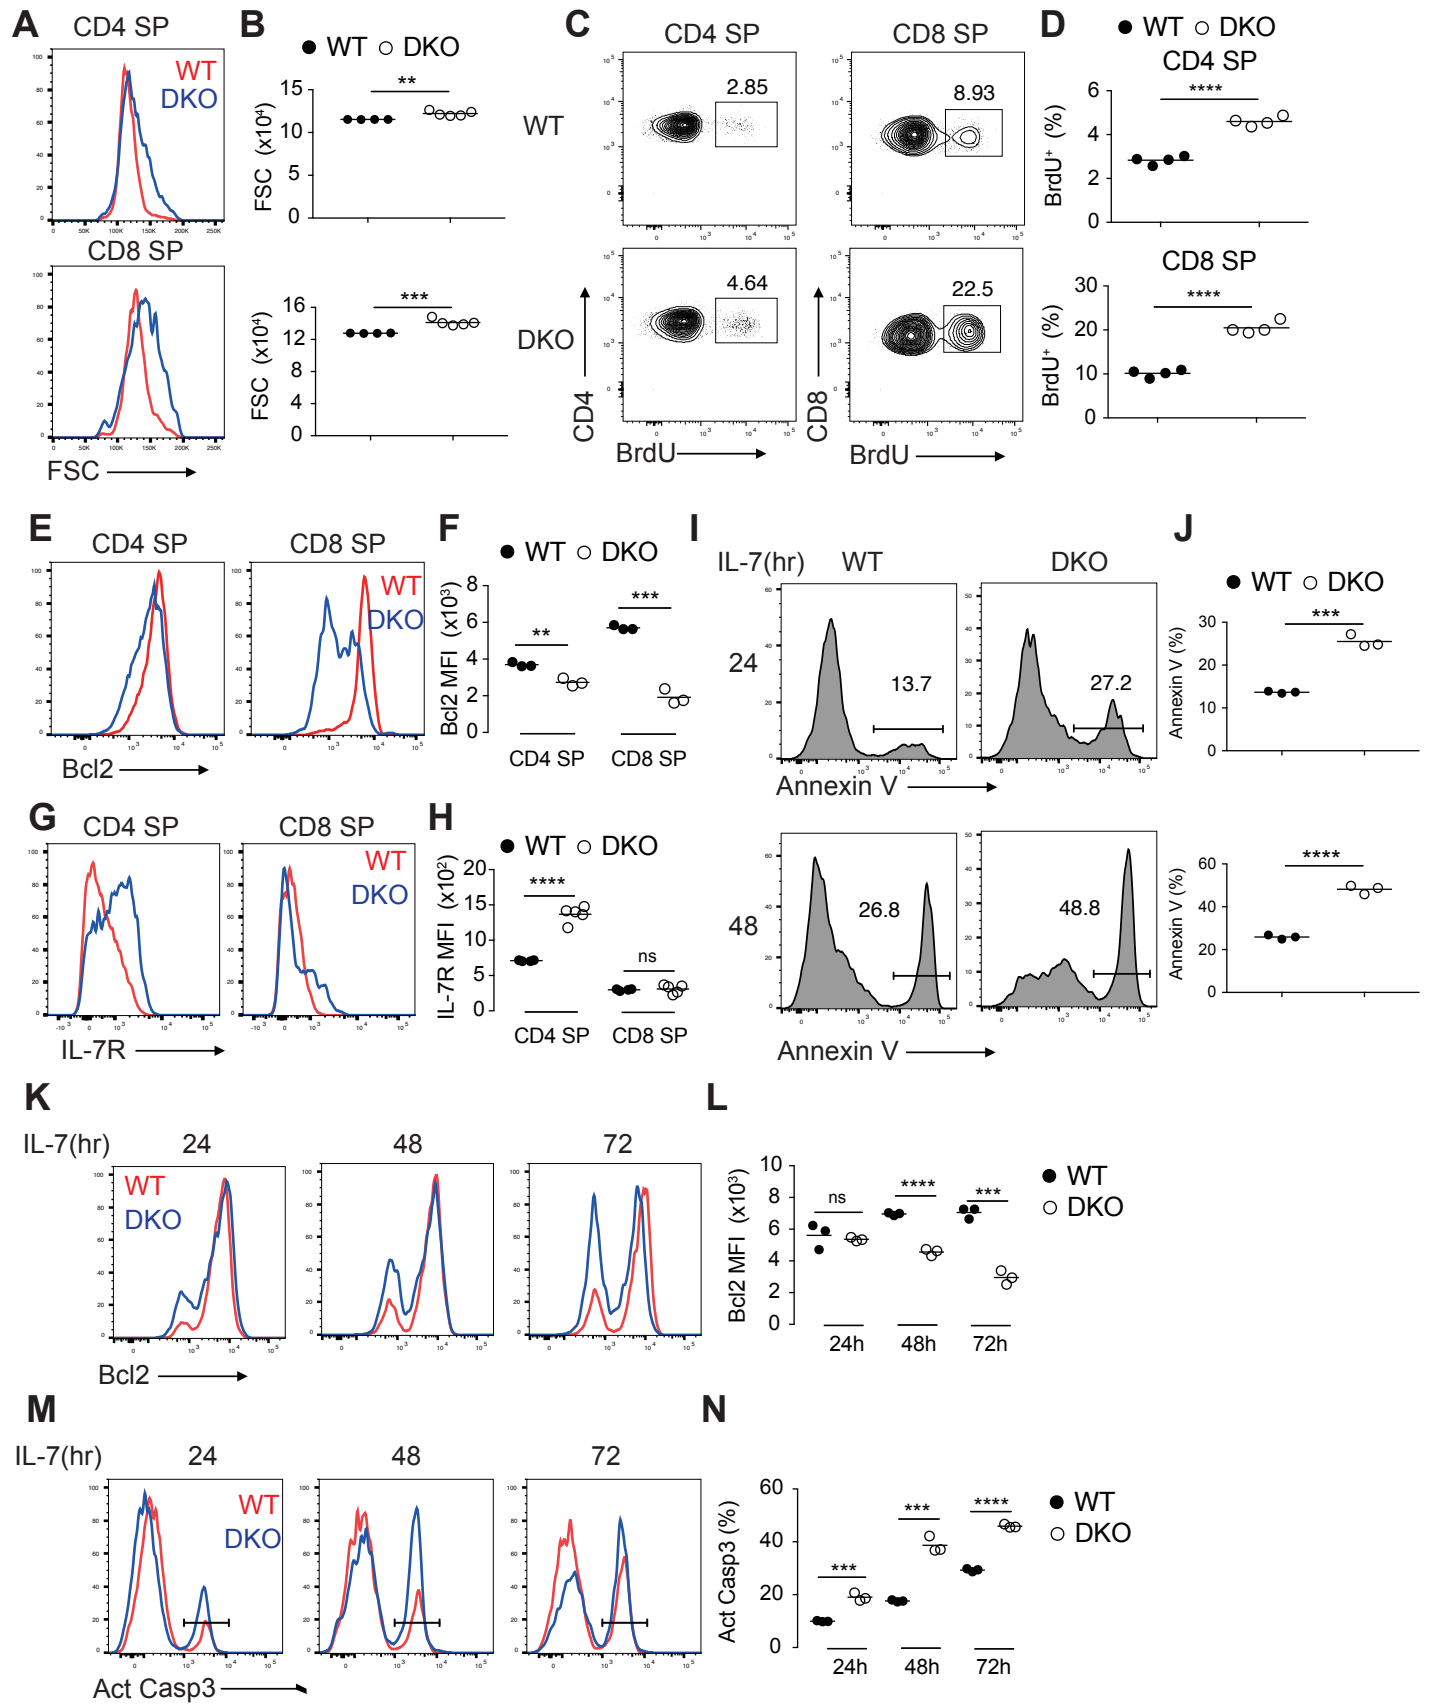

**Fig. S3. GSK3 promotes survival of SP thymocytes**

(A-D) Flow cytometry analysis of size and proliferation of CD4 and CD8 SP thymocytes from 4-6 week-old WT (red) and DKO (blue) mice at 16 hours after BrdU injection. FSC, forward scatter. n=4 per group. (B) Summary of FSC. (D) Summary of the percentage of BrdU<sup>+</sup> cells among CD4 (upper) and CD8 SP thymocytes (lower). (E-H) Flow cytometry analysis of DP, CD4 and CD8 SP thymocytes from WT (red) and DKO (blue) mice for intracellular Bcl2 (E) and surface IL-7R (G) expression. MFI of Bcl2 (F) and IL-7R (H) expression on CD4 and CD8 SP thymocytes. (I and J) Annexin V staining of CD4 SP thymocytes stimulated with 1 ng/ml IL-7 for 24 and 48 hours. (J) Summary of the percentage of Annexin V<sup>+</sup> cells. (K-N) Intracellular staining of Bcl2 (K and L) and active caspase 3 (M and N) in CD4 SP thymocytes stimulated with 1 ng/ml IL-7 for 24, 48, and 72 hours. (L) MFI of Bcl2. (N) Summary of the percentage of active caspase 3<sup>+</sup> cells. Each symbol represents an individual mouse. Small horizontal lines indicate the mean ( $\pm$  s.e.m.). \*\*, P < 0.01; \*\*\*, P < 0.001; \*\*\*\*, P < 0.0001. Data are representative of at least two independent experiments.

Fig. S4

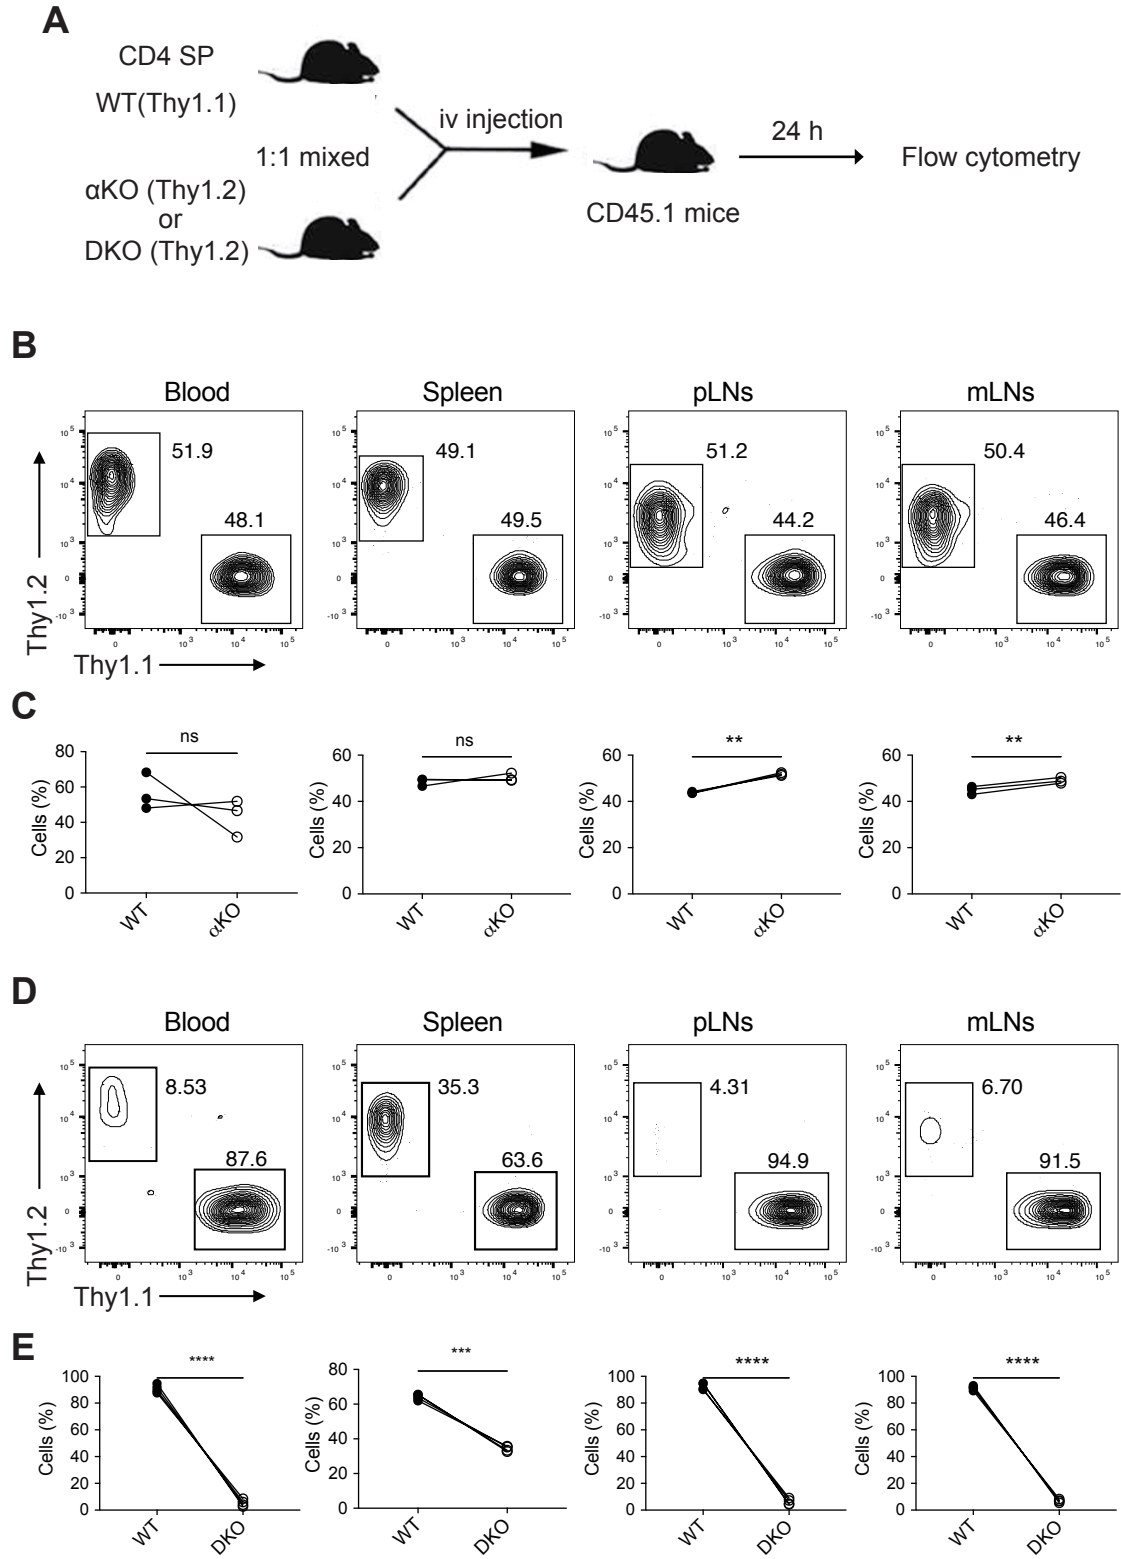



**Fig. S4. Homing defect of *Gsk3*-deficient CD4 SP thymocytes**

(A) Experimental outline. CD4 SP thymocytes from WT (Thy1.1<sup>+</sup>) and  $\alpha$ KO (Thy1.2<sup>+</sup>) or DKO (Thy1.2<sup>+</sup>) mice (all CD45.2<sup>+</sup>) were mixed in a 1:1 ratio, adoptively transferred to CD45.1<sup>+</sup> recipient mice, followed by flow cytometry analysis of blood, spleen, peripheral and mesenteric lymph nodes (pLNs and mLNs) at 24 hours after transfer. (B-E) Flow cytometry analysis of CD45.2<sup>+</sup>Thy1.1<sup>+</sup> and CD45.2<sup>+</sup>Thy1.2<sup>+</sup> cells in blood, spleen, pLNs and mLNs of CD45.1<sup>+</sup> recipient mice. (B and D) Representative FACS plots. (C and E) Summary of the percentage and numbers of CD45.2<sup>+</sup>Thy1.1<sup>+</sup> and CD45.2<sup>+</sup>Thy1.2<sup>+</sup> cells. Each symbol represents an individual mouse. Small horizontal lines indicate the mean ( $\pm$  s.e.m.). \*\*, P < 0.01; \*\*\*, P < 0.001; \*\*\*\*, P < 0.0001. Data are representative of two independent experiments.

Fig. S5

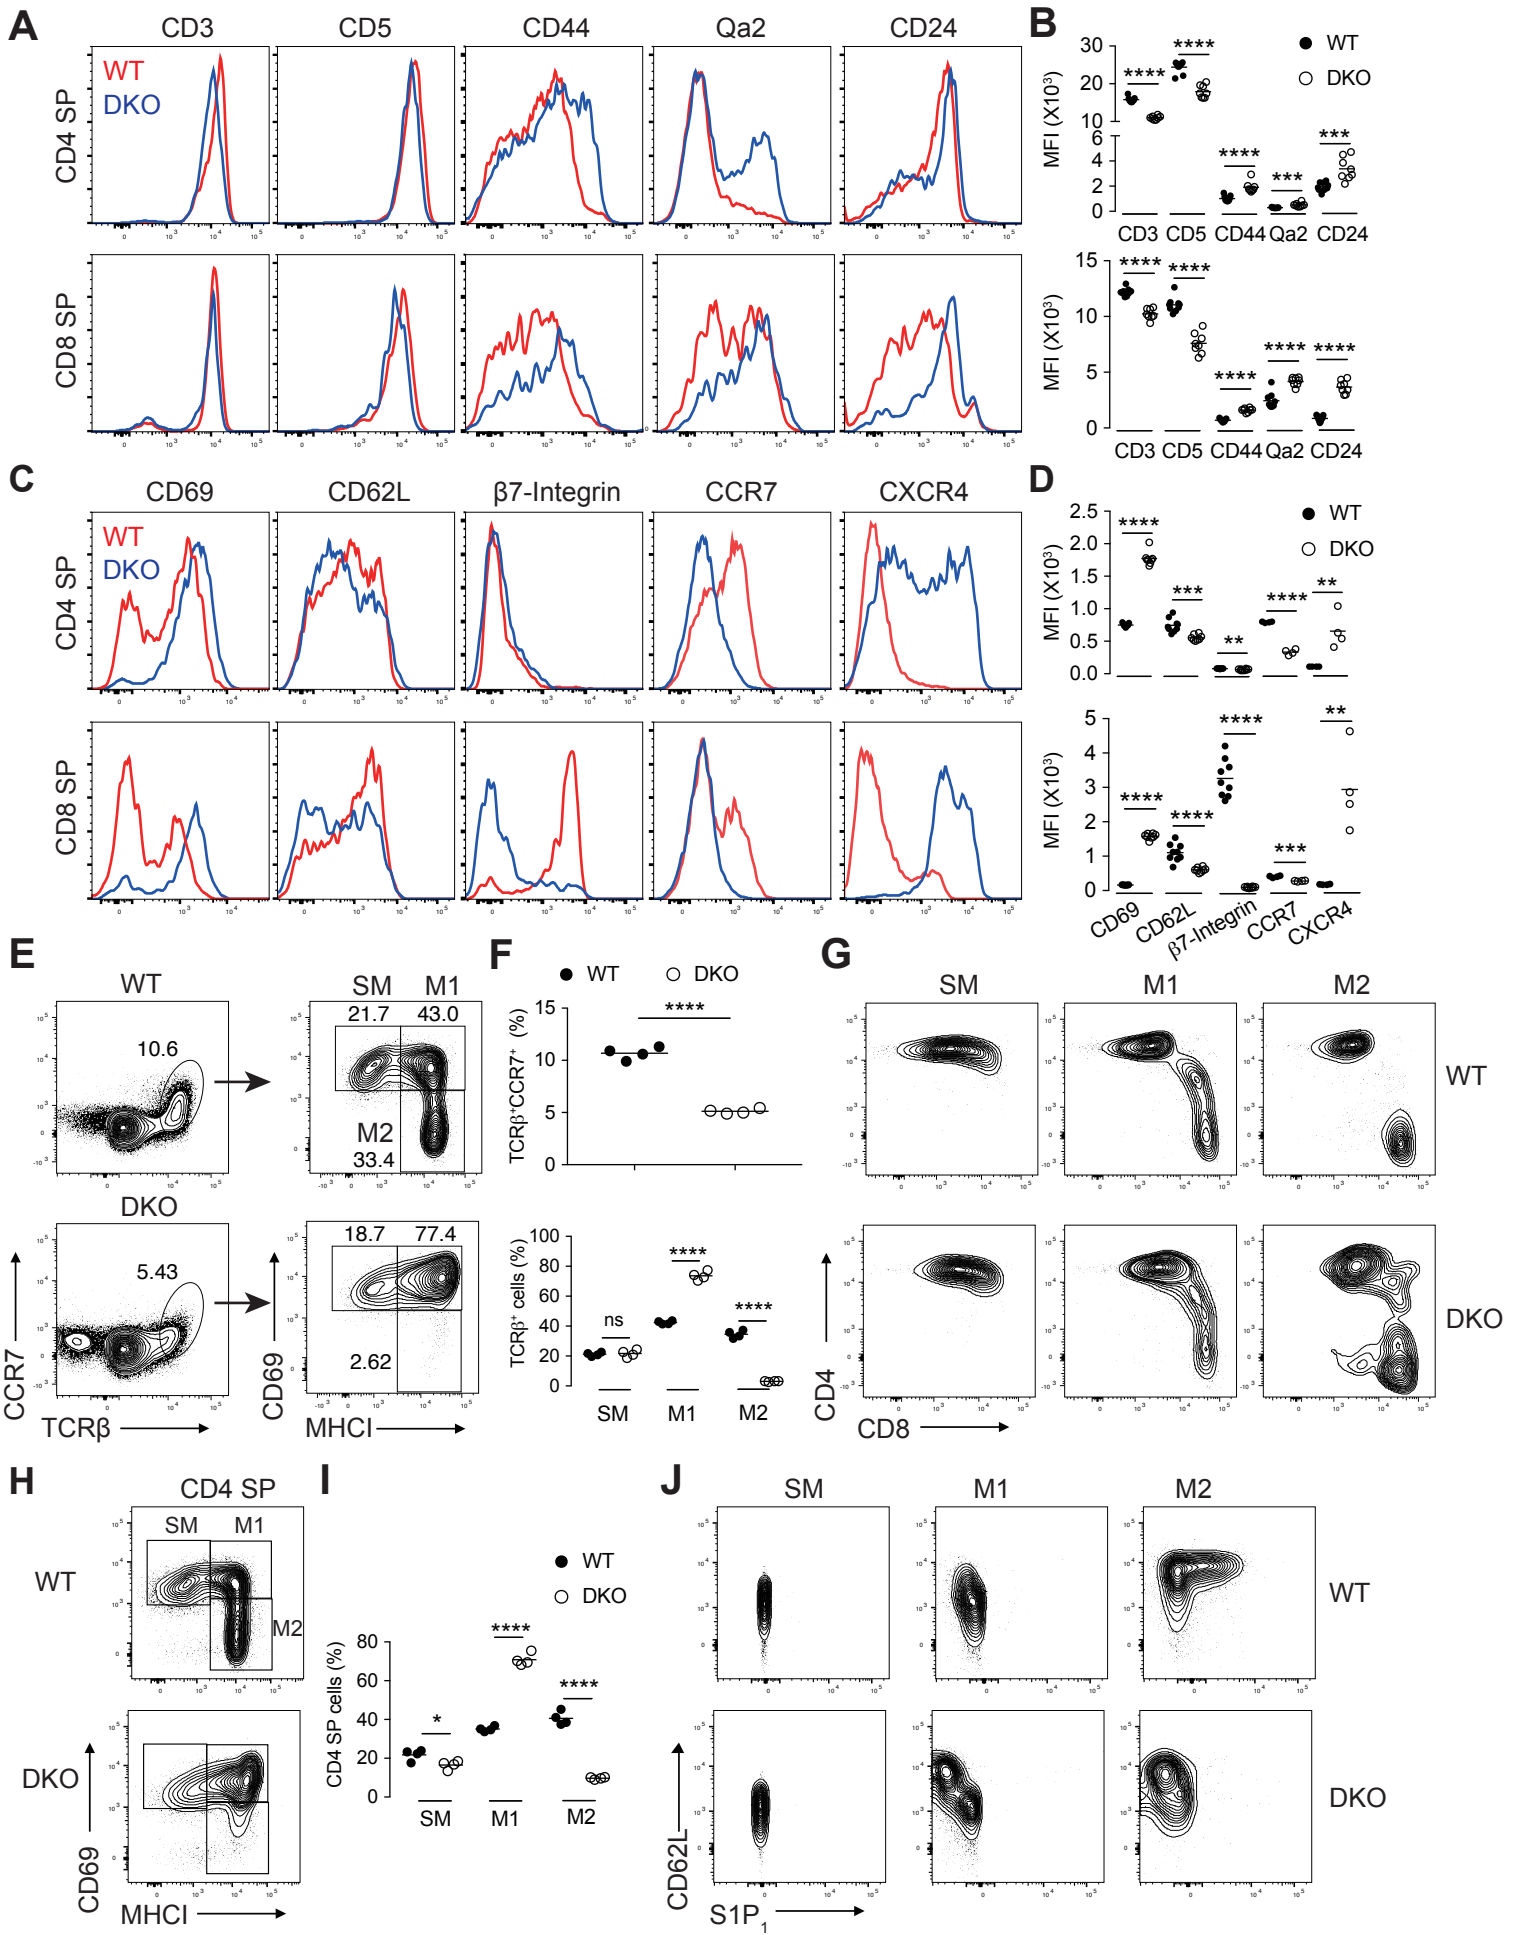

**Fig. S5. GSK3 controls expression of molecules critical for thymocyte trafficking**

(A-D) Flow cytometry analysis of maturation (A and B) and trafficking molecules (C and D) on CD4 (upper) and CD8 (lower) SP thymocytes from 4-6 week-old WT and DKO mice. MFI of indicated maturation (B) and trafficking molecules (D). (E) Flow cytometry analysis of CCR7 and TCR $\beta$  expression on thymocytes from WT and DKO mice. Post-positive selection thymocytes (CCR7<sup>+</sup>TCR $\beta$ <sup>+</sup>) were separated into three subpopulations (SM, M1 and M2) based on CD69 and MHC I expression (E), followed by analysis of CD4 and CD8 expression (G). (F) Summary of the percentage of CCR7<sup>+</sup>TCR $\beta$ <sup>+</sup> (upper) and TCR $\beta$ <sup>+</sup> cells gated on SM, M1 and M2 subpopulations (lower). (H) Flow cytometry analysis of CD69 and MHC I expression on CD4 SP thymocytes from WT and DKO mice. (I) Summary of the percentage of CD4 SP cells gated on SM, M1 and M2 subpopulations. (J) Flow cytometry analysis of CD62L and S1P<sub>1</sub> expression on SM, M1 and M2 subpopulations of CD4 SP thymocytes from WT and DKO mice (n $\geq$ 4 per group). Each symbol represents an individual mouse. Small horizontal lines indicate the mean ( $\pm$  s.e.m.). \*, P < 0.1; \*\*, P < 0.01; \*\*\*, P < 0.001; \*\*\*\*, P < 0.0001. Data are representative of three (A-D) and two (E-J) independent experiments.

Fig. S6

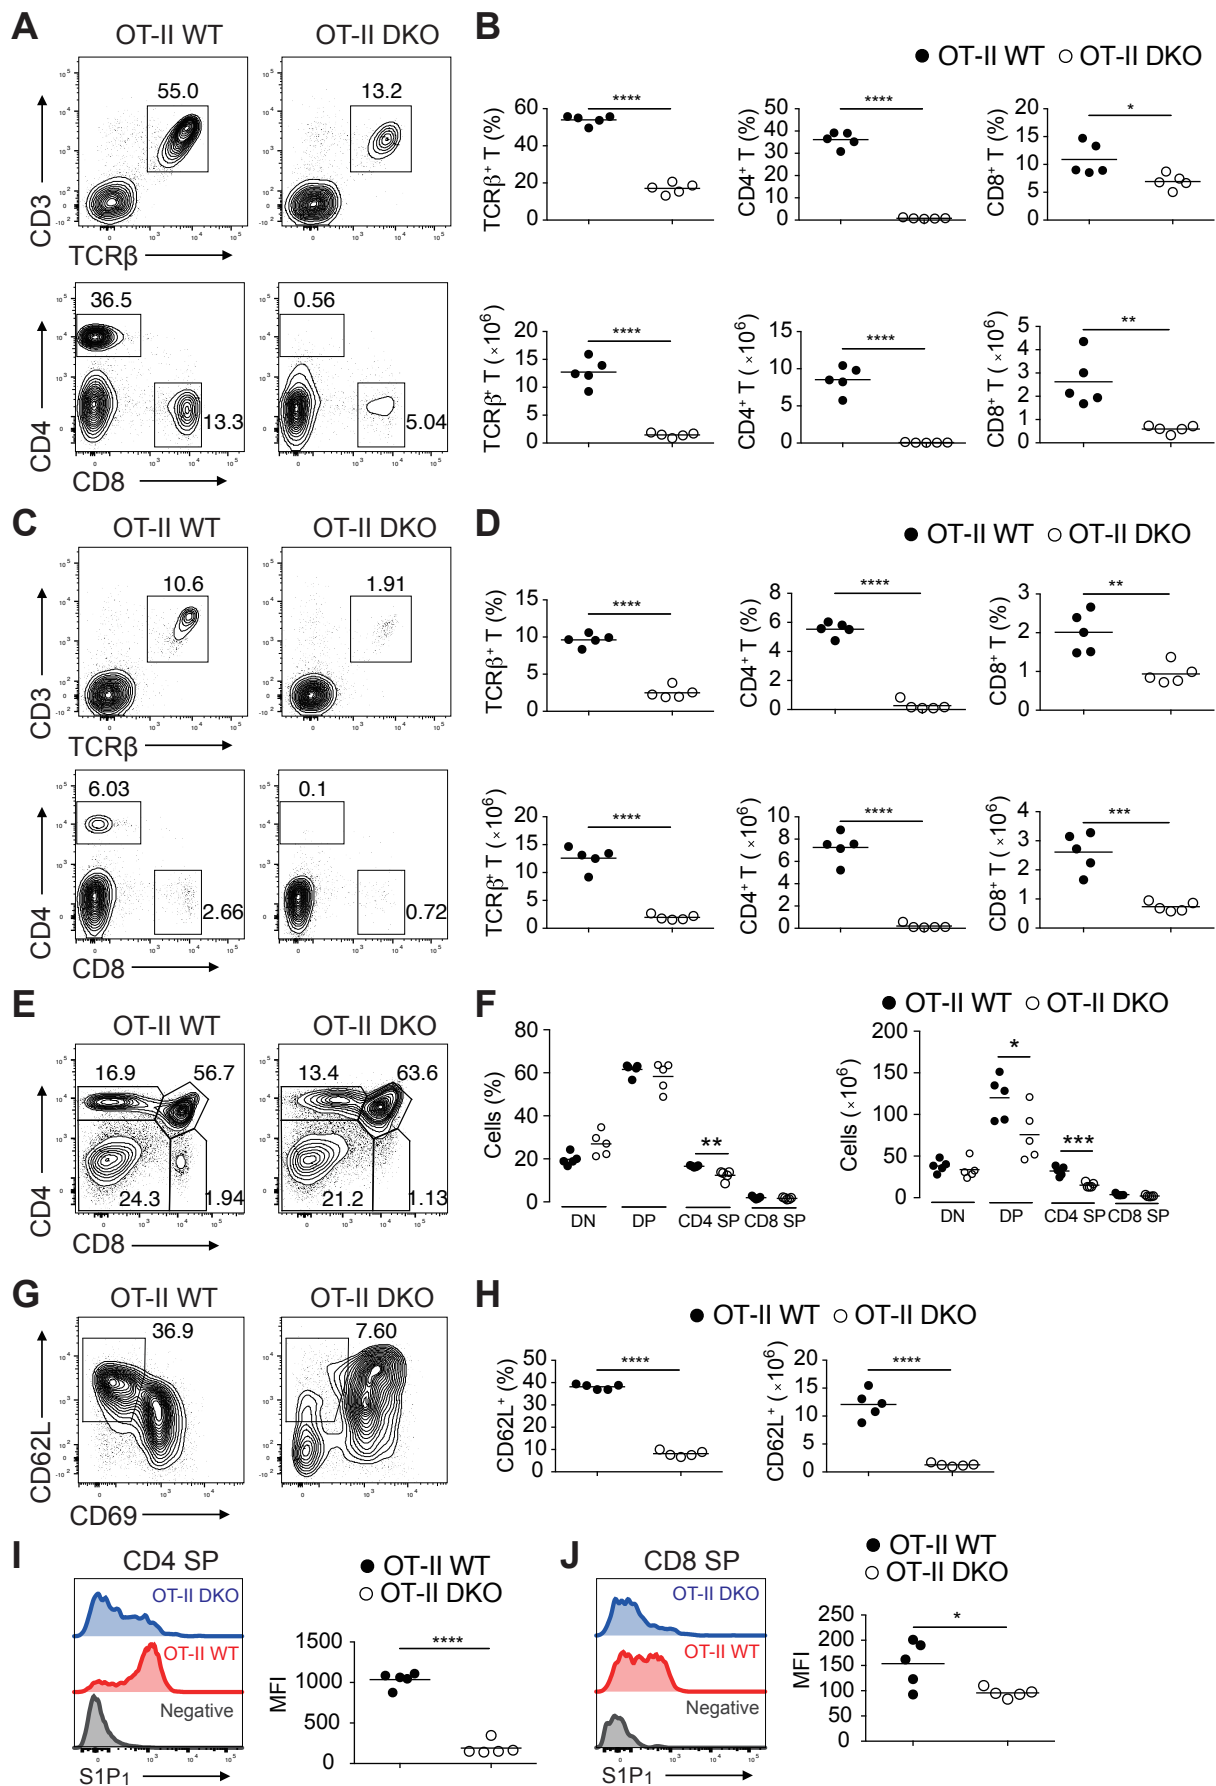

**Fig. S6. The effect of *Gsk3*-deficiency on the development and egress of OT-II TCR transgenic thymocytes**

(A-D) Flow cytometry analysis of CD3<sup>+</sup>TCRβ<sup>+</sup> (upper), CD4<sup>+</sup> and CD8<sup>+</sup> (lower) T cells in the lymph nodes (A) and spleen (C) of 4-6 week-old WT and DKO OT-II mice. (A and C) Representative FACS plots. (B and D) Summary of the percentage and number of CD3<sup>+</sup>TCRβ<sup>+</sup> (upper), CD4<sup>+</sup> and CD8<sup>+</sup> T cells (lower) (n≥3 per group). (E and F) Flow cytometry analysis of thymocyte development in mice in (A). (E) Representative FACS plots. (F) Summary of the percentage and number of DN, DP, CD4 and CD8 SP thymocytes. (G and H) Flow cytometry analysis of CD62L<sup>hi</sup>CD69<sup>lo</sup> and CD62L<sup>lo</sup>CD69<sup>hi</sup> cells among CD4 SP thymocytes in (E). (G) Representative FACS plots. (H) Summary of the percentage and number of CD62L<sup>hi</sup>CD69<sup>lo</sup> cells among CD4 SP thymocytes. (I and J) S1P<sub>1</sub> expression on CD62L<sup>hi</sup>CD69<sup>lo</sup> CD4 (I) and CD8 (J) SP thymocytes from WT and DKO OT-II mice was analyzed by flow cytometry. CD62L<sup>lo</sup>CD69<sup>hi</sup> cells as a negative control (gray). Right panels, MFI of S1P<sub>1</sub> expression on CD62L<sup>hi</sup>CD69<sup>lo</sup> CD4 (I) and CD8 (J) SP thymocytes of indicated genotypes. Each symbol represents an individual mouse. Small horizontal lines indicate the mean (± s.e.m.). \*, P < 0.1; \*\*, P < 0.01; \*\*\*, P < 0.001; \*\*\*\*, P < 0.0001. Data are representative of two independent experiments.

Fig. S7

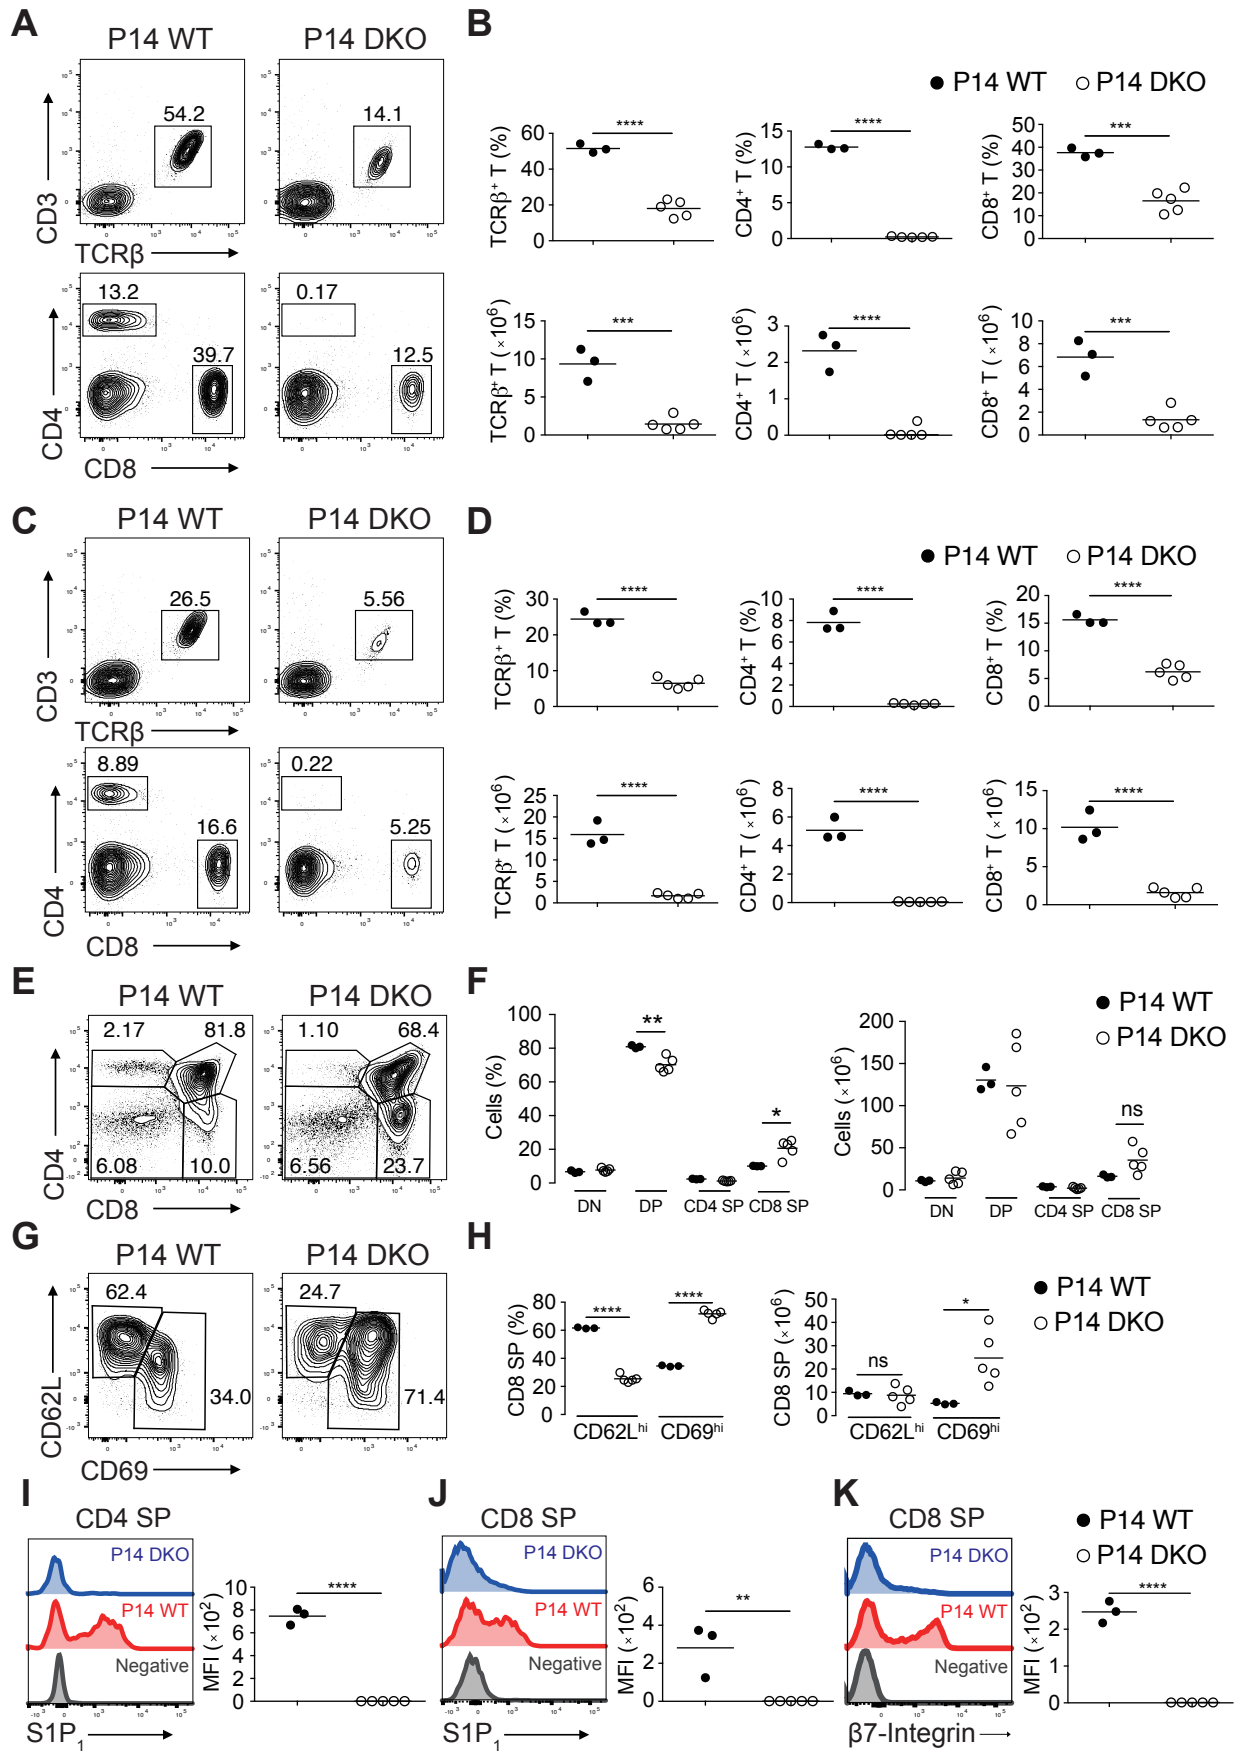

**Fig. S7. The effect of *Gsk3*-deficiency on the development and egress of P14 TCR transgenic thymocytes**

(A-D) Flow cytometry analysis of CD3<sup>+</sup>TCRβ<sup>+</sup> (upper), CD4<sup>+</sup> and CD8<sup>+</sup> (lower) T cells in the lymph nodes (A) and spleen (D) of 4-6 week-old WT and DKO P14 mice. (A and C) Representative FACS plots. (B and D) Summary of the percentage and number of CD3<sup>+</sup>TCRβ<sup>+</sup> (upper), CD4<sup>+</sup> and CD8<sup>+</sup> T cells (lower) (n≥3 per group). (E and F) Flow cytometry analysis of thymocyte development in mice in (A). (E) Representative FACS plots. (F) Summary of the percentage and number of DN, DP, CD4 and CD8 SP thymocytes. (G and H) Flow cytometry analysis of CD62L<sup>hi</sup>CD69<sup>lo</sup> and CD62L<sup>lo</sup>CD69<sup>hi</sup> cells among CD8 SP thymocytes in (E). (G) Representative FACS plots. (H) Summary of the percentage and number of CD62L<sup>hi</sup>CD69<sup>lo</sup> cells among CD8 SP thymocytes. (I and J) S1P<sub>1</sub> expression on CD62L<sup>hi</sup>CD69<sup>lo</sup> CD4 (I) and CD8 (J) SP thymocytes from WT and DKO P14 mice was analyzed by flow cytometry. CD62L<sup>lo</sup>CD69<sup>hi</sup> cells as a negative control (gray). Right panels, MFI of S1P<sub>1</sub> expression on CD62L<sup>hi</sup>CD69<sup>lo</sup> CD4 (I) and CD8 (J) SP thymocytes of indicated genotypes. (K) β7-integrin expression on CD8 SP thymocytes in (G). Each symbol represents an individual mouse. Small horizontal lines indicate the mean (± s.e.m.). \*, P < 0.1; \*\*, P < 0.01; \*\*\*, P < 0.001; \*\*\*\*, P < 0.0001. Data are representative of two independent experiments.

Fig. S8

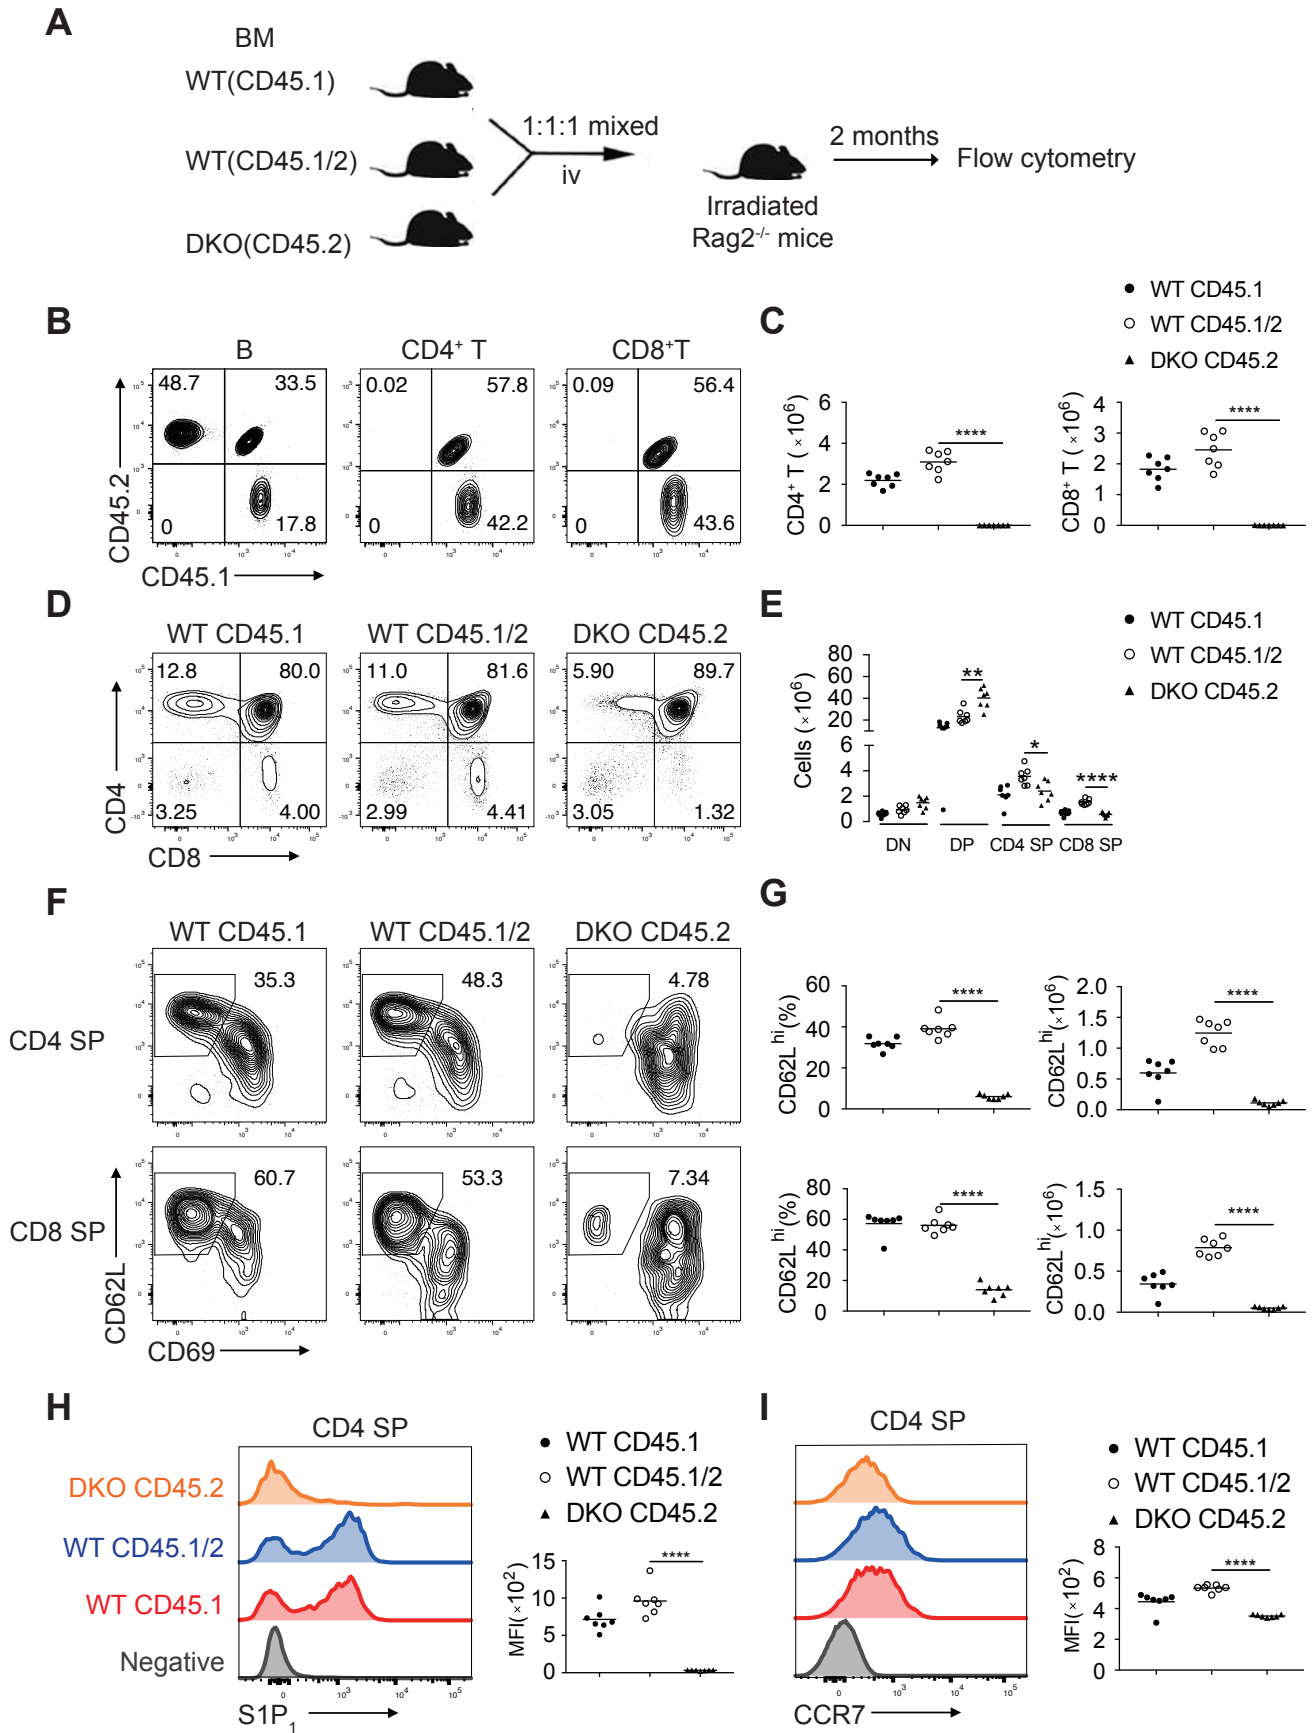



**Fig. S8. T cell-intrinsic role of GSK3 in thymocyte development and egress**

(A) Experimental outline. Irradiated *Rag2*<sup>-/-</sup> mice were reconstituted with bone marrow cells from WT (CD45.1<sup>+</sup>), WT (CD45.1<sup>+</sup>/CD45.2<sup>+</sup>) and DKO (CD45.2<sup>+</sup>) mice in a 1:1:1 ratio and analyzed by flow cytometry 2 months after reconstitution. (B and C) Flow cytometry analysis of CD45.1<sup>+</sup> and CD45.2<sup>+</sup> cells among B, CD4<sup>+</sup> and CD8<sup>+</sup> T cells in the lymph nodes of mixed bone marrow chimeras in (A). (B) Representative FACS plots. (C) Summary of numbers of CD4<sup>+</sup> and CD8<sup>+</sup> T cells in (B) (n=7 per group). (D and E) Flow cytometry analysis of thymocyte development in mixed bone marrow chimeras in (A). (D) Representative FACS plots. (E) Summary of numbers of DN, DP, CD4 and CD8 SP thymocytes in (D) (n=7). (F and G) Flow cytometry analysis of CD62L<sup>hi</sup>CD69<sup>lo</sup> CD4 (upper) and CD8 (lower) SP thymocytes in mixed bone marrow chimeras in (A). (F) Representative FACS plots. (G) Summary of percentage and number of CD62L<sup>hi</sup>CD69<sup>lo</sup> cells in (F) (n=7). (H and I) Flow cytometry analysis of S1P<sub>1</sub> (H) and CCR7 (I) expression on CD62L<sup>hi</sup>CD69<sup>lo</sup> CD4 SP thymocytes in mixed bone marrow chimeras in (A). CD62L<sup>lo</sup>CD69<sup>hi</sup> cells as a negative control (gray). Right panels, MFI of S1P<sub>1</sub> (H) and CCR7 (I) expression on CD62L<sup>hi</sup>CD69<sup>lo</sup> CD4 SP thymocytes of indicated groups (n=7). Each symbol represents an individual mouse. Small horizontal lines indicate the mean (± s.e.m.). \*, P <0.1; \*\*, P <0.01; \*\*\*\*P < 0.0001. Data are representative of three independent experiments.

Fig. S9

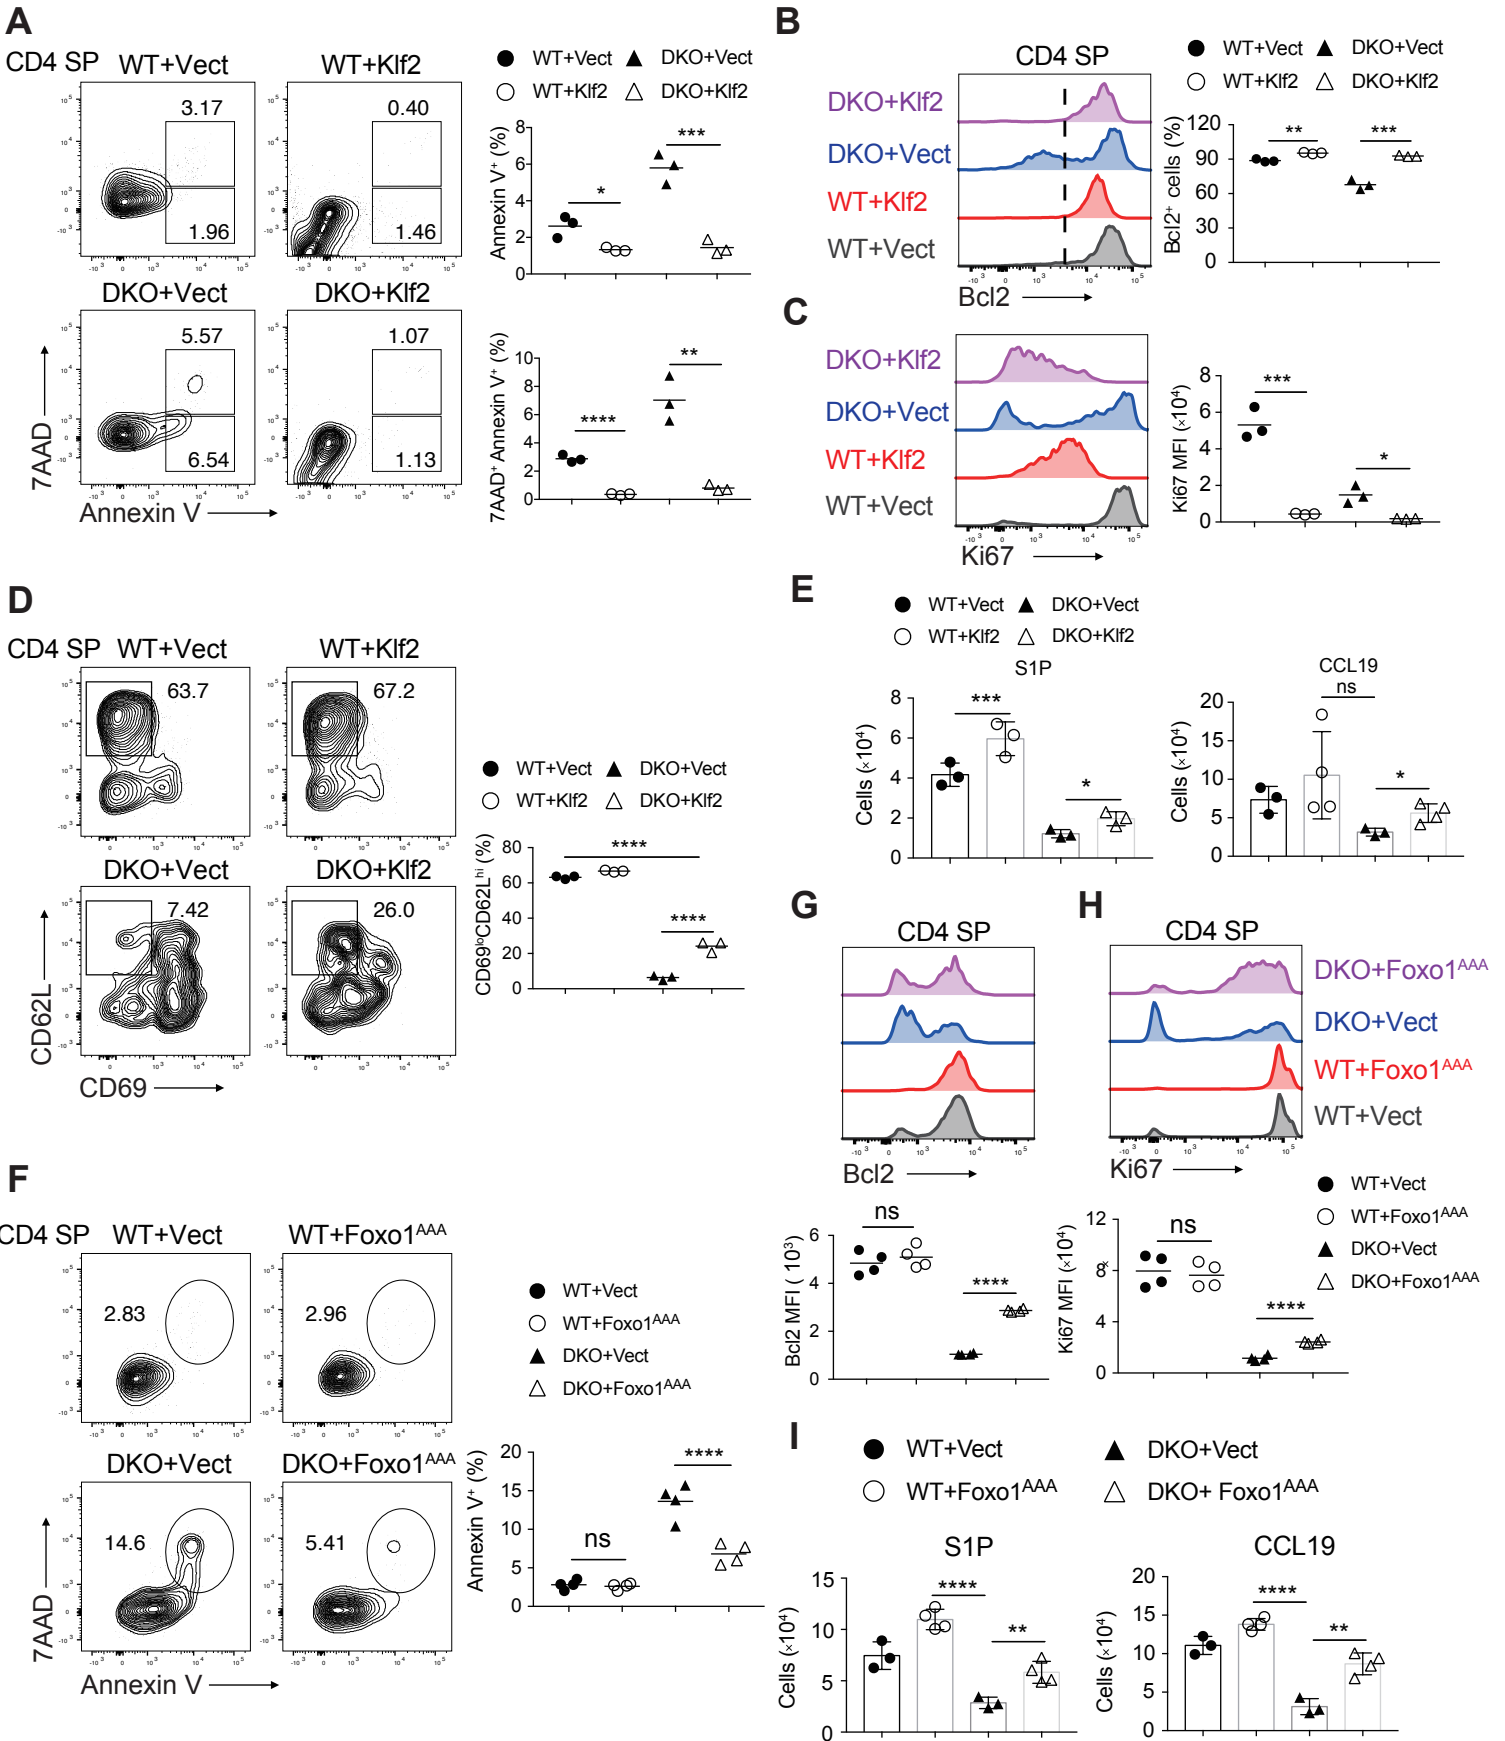

**Fig. S9. Effects of Klf2 and constitutively active Foxo1 on the survival, proliferation and migration of *Gsk3*-deficient CD4 SP thymocytes.**

(A-D) Flow cytometry analysis of apoptosis (Annexin V<sup>+</sup>7AAD<sup>+</sup>) (A), Bcl2 expression (B), proliferation (Ki67<sup>+</sup>) (C), CD62L and CD69 expression (D) in DKO and WT CD4 SP thymocytes transduced with retroviruses encoding Klf2 or empty retroviruses (Vect). (E) Transwell migration assay of DKO and WT CD4 SP thymocytes transduced with retroviruses encoding Klf2 or empty retroviruses and stimulated with S1P (left) and CCL19 (right). (F-H) Flow cytometry analysis of apoptosis (Annexin V<sup>+</sup>7AAD<sup>+</sup>) (F), Bcl2 expression (G) and proliferation (Ki67<sup>+</sup>) (H) of DKO and WT CD4 SP thymocytes transduced with retroviruses encoding Foxo1AAA or empty retroviruses (Vect). (I) Transwell migration assay of DKO and WT CD4 SP thymocytes transduced with retroviruses encoding Foxo1AAA or empty retroviruses and stimulated with S1P (left) and CCL19 (right). Each symbol represents an individual mouse. Small horizontal lines indicate the mean ( $\pm$  s.e.m.). \*, P <0.1; \*\*, P <0.01; \*\*\*, P <0.001; \*\*\*\*, P <0.0001. Data are representative of two independent experiments.

Fig. S10

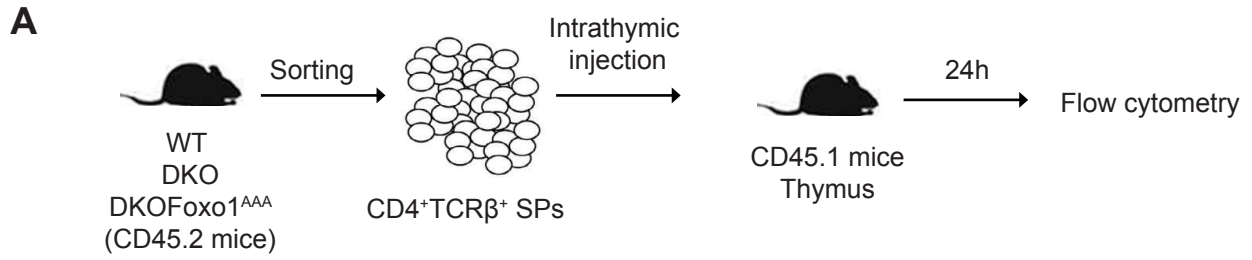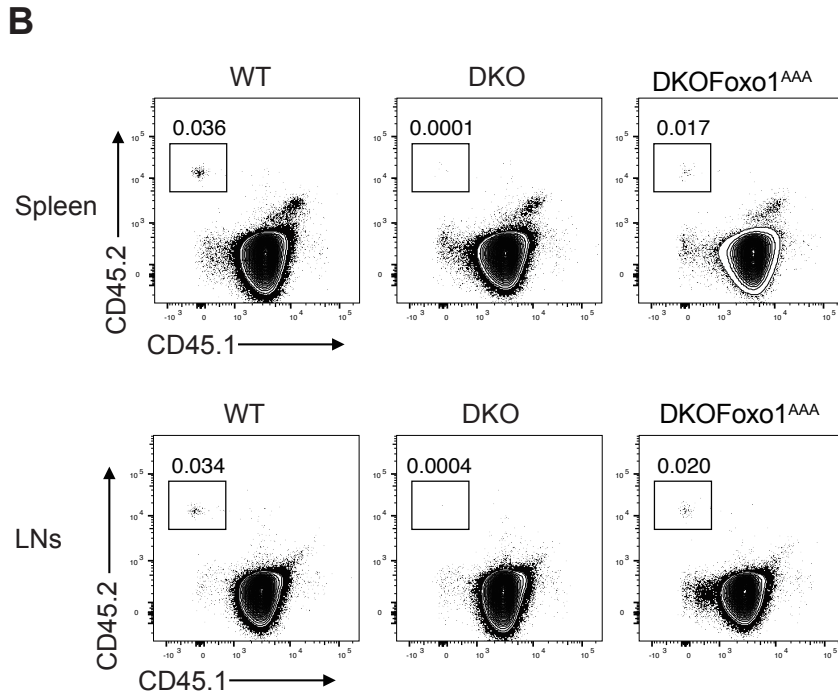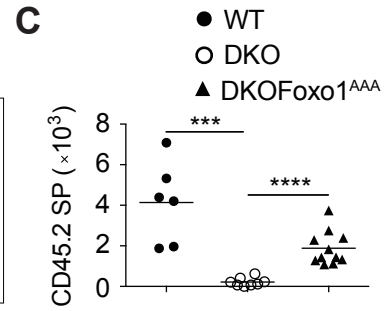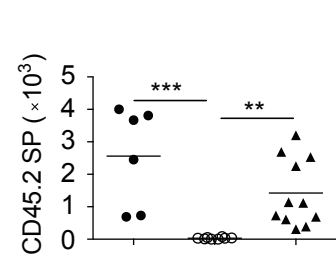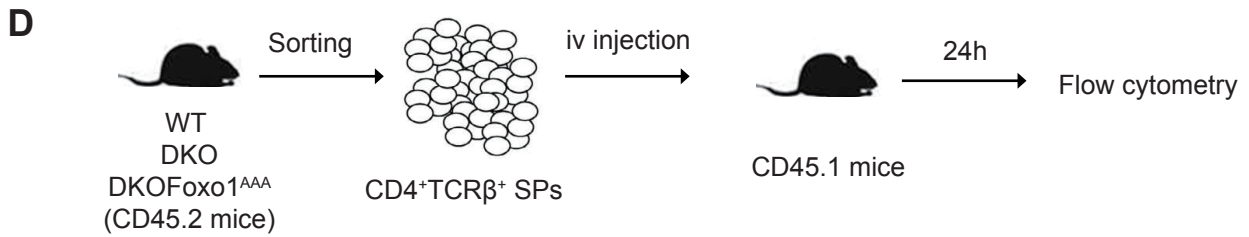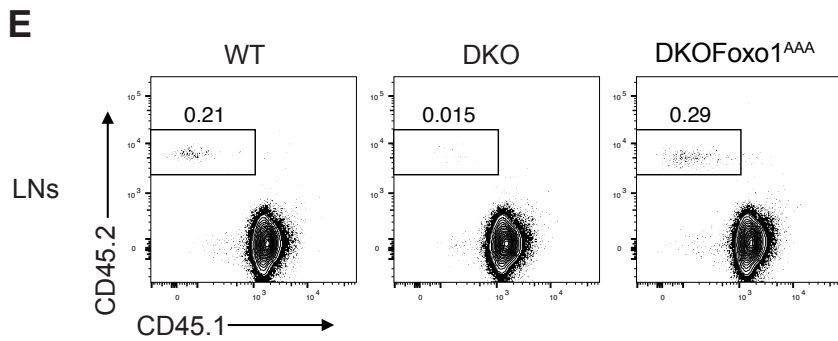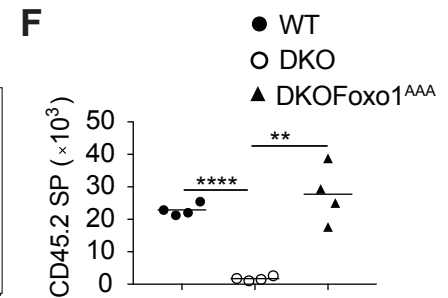

**Fig. S10. Constitutively active Foxo1 restores the egress and homing of *Gsk3*-deficient thymocytes**

(A and D) Experimental outlines. CD4<sup>+</sup>TCRβ<sup>+</sup> SP thymocytes from WT, DKO and DKOFoxo1<sup>AAA</sup> mice (all CD45.2<sup>+</sup>) were adoptively transferred into CD45.1<sup>+</sup> recipient mice by intrathymic (A) or intravenous (D) injection, followed by flow cytometry analysis at 24 hours after transfer. (B, C, E and F) Flow cytometry analysis of CD45.2<sup>+</sup> cells among TCRβ<sup>+</sup> cells in the spleen and lymph nodes of recipient mice in (A and D). (B and E) Representative FACS plots. (C and F) Summary of number of TCRβ<sup>+</sup>CD45.2<sup>+</sup> cells in (B and E) (n≥6 per group). Each symbol represents an individual mouse. Small horizontal lines indicate the mean (± s.e.m.). \*\*, P < 0.01; \*\*\*, P < 0.001; \*\*\*\*, P < 0.0001. Data are representative of two independent experiments.

Fig. S11

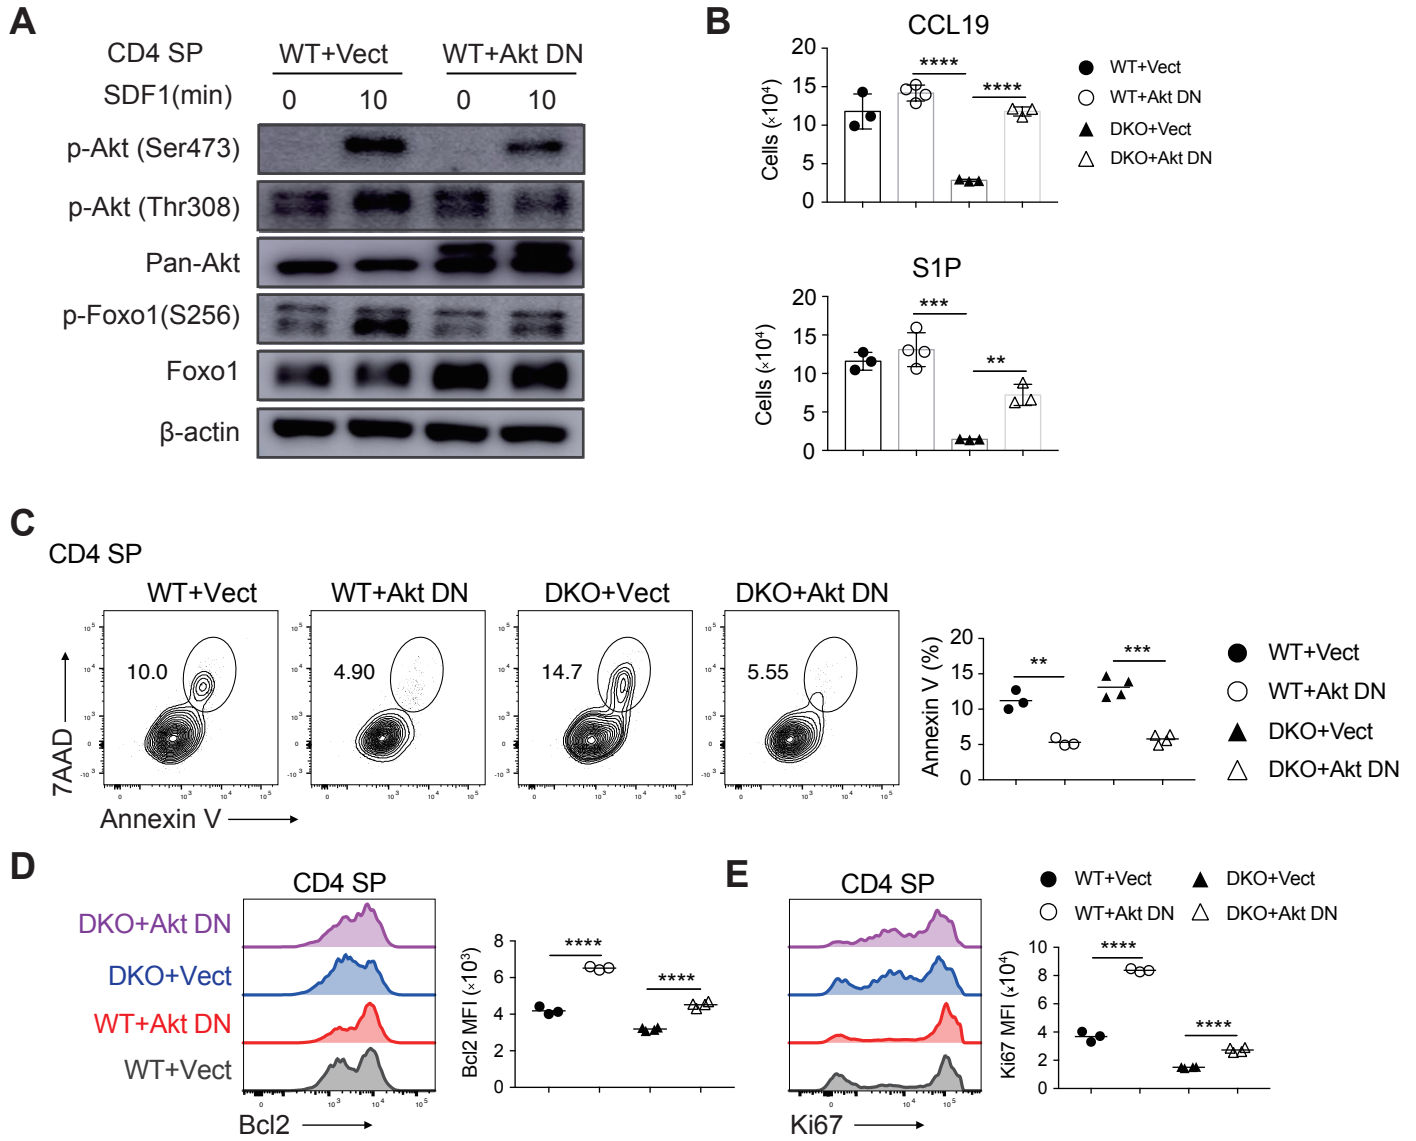

**Fig. S11. Effects of dominant negative Akt on the survival, proliferation and migration of *Gsk3*-deficient CD4 SP thymocytes.**

(A) Immunoblot of p-Akt, pan-Akt, p-Foxo1, Foxo1 and  $\beta$ -actin in CD4 SP thymocytes from irradiated *Rag2*<sup>-/-</sup> mice reconstituted with WT bone marrow cells transduced with retroviruses encoding Akt-DN or empty retroviruses (Vect) and stimulated with SDF1 for 10 min. (B) Transwell migration assay of DKO and WT CD4 SP thymocytes transduced with retroviruses encoding Akt-DN or Vect and stimulated with CCL19 (upper) and S1P (lower). (C-E) Flow cytometry analysis of apoptosis (Annexin V<sup>+</sup>7AAD<sup>+</sup>) (C), Bcl2 expression (D) and proliferation (Ki67<sup>+</sup>) (E) of DKO and WT CD4 SP thymocytes transduced with retroviruses encoding Akt-DN or empty retroviruses (Vect). Each symbol represents an individual mouse. Small horizontal lines indicate the mean ( $\pm$  s.e.m.). \*\*, P < 0.01; \*\*\*, P < 0.001; \*\*\*\*, P < 0.0001. Data are representative of two independent experiments.

Fig. S12

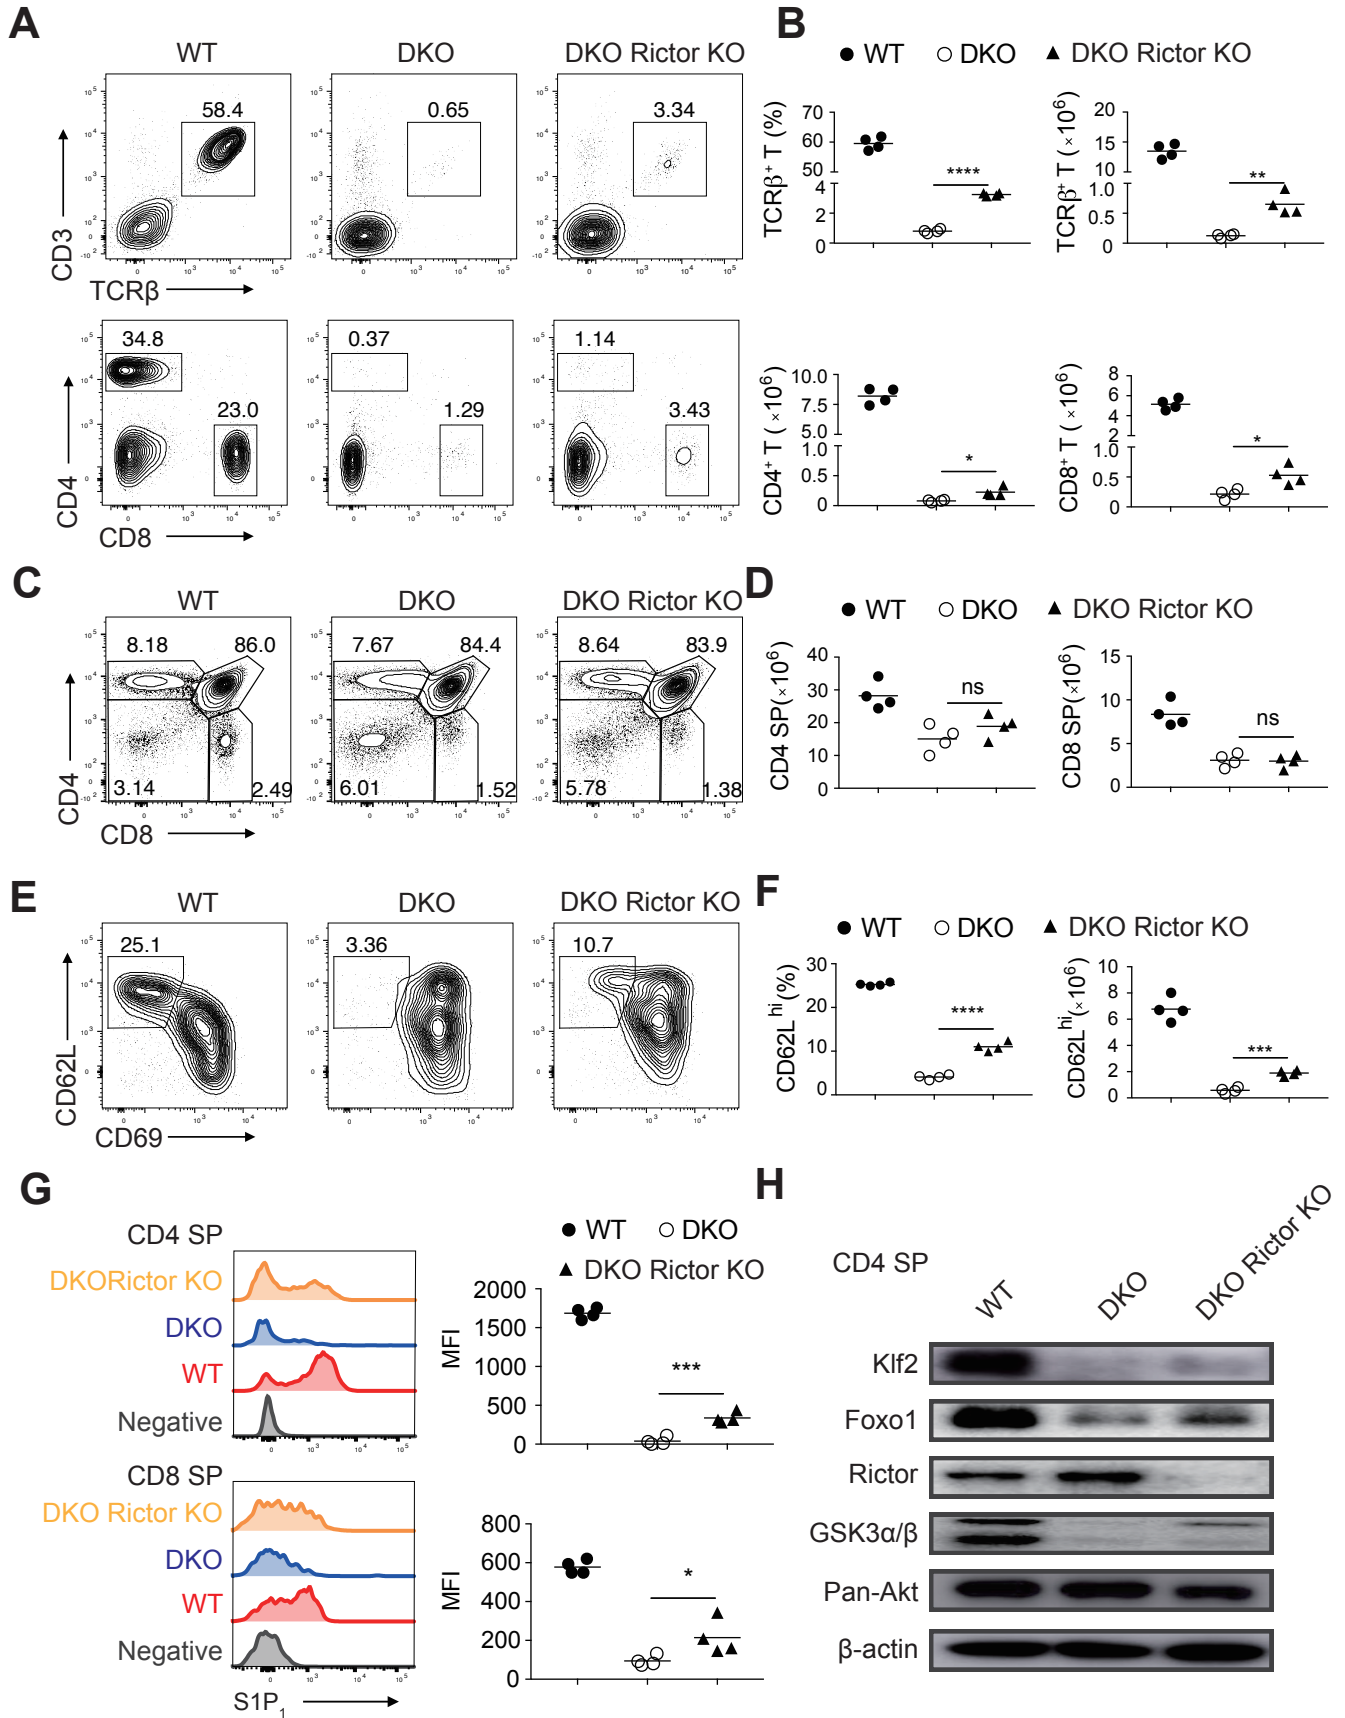



**Fig. S12. Deletion of Rictor has a marginal effect on the egress of *Gsk3*-deficient thymocytes**

(A) Flow cytometry analysis of CD3<sup>+</sup>TCRβ<sup>+</sup> (upper), CD4<sup>+</sup> and CD8<sup>+</sup> T (lower) cells in the lymph nodes of 4-6 week-old WT, DKO and *Gsk3a*<sup>-/-</sup>*b*<sup>-/-</sup>*Rictor*<sup>-/-</sup> (DKO Rictor KO) mice. (B) Summary of the percentage and number of CD3<sup>+</sup>TCRβ<sup>+</sup> (upper), CD4<sup>+</sup> and CD8<sup>+</sup> T cells (lower) in (A) (n≥4 per group). (C) Flow cytometry analysis of thymocyte development in mice in (A). (D) Summary of numbers of CD4 and CD8 SP thymocyte in (C). (E) Flow cytometry analysis of CD62L<sup>hi</sup>CD69<sup>lo</sup> cells among CD4 SP thymocytes in mice in (A). (F) Summary of the percentage and number of CD62L<sup>hi</sup>CD69<sup>lo</sup> cells among CD4 SP cells in (E). (G) S1P<sub>1</sub> expression on CD62L<sup>hi</sup>CD69<sup>lo</sup> CD4 (upper) and CD8 (lower) SP thymocytes in mice in (A) was analyzed by flow cytometry. CD62L<sup>lo</sup>CD69<sup>hi</sup> cells as a negative control (gray). Right panel, MFI of S1P<sub>1</sub> expression on CD62L<sup>hi</sup>CD69<sup>lo</sup> CD4 SP thymocytes of indicated genotypes. (H) Immunoblot analysis of CD4 SP thymocytes of indicated genotypes. Each symbol represents an individual mouse. Small horizontal lines indicate the mean (± s.e.m.). \*, P < 0.1; \*\*, P < 0.01; \*\*\*, P < 0.001; \*\*\*\*, P < 0.0001. Data are representative of three independent experiments.

Fig. S13

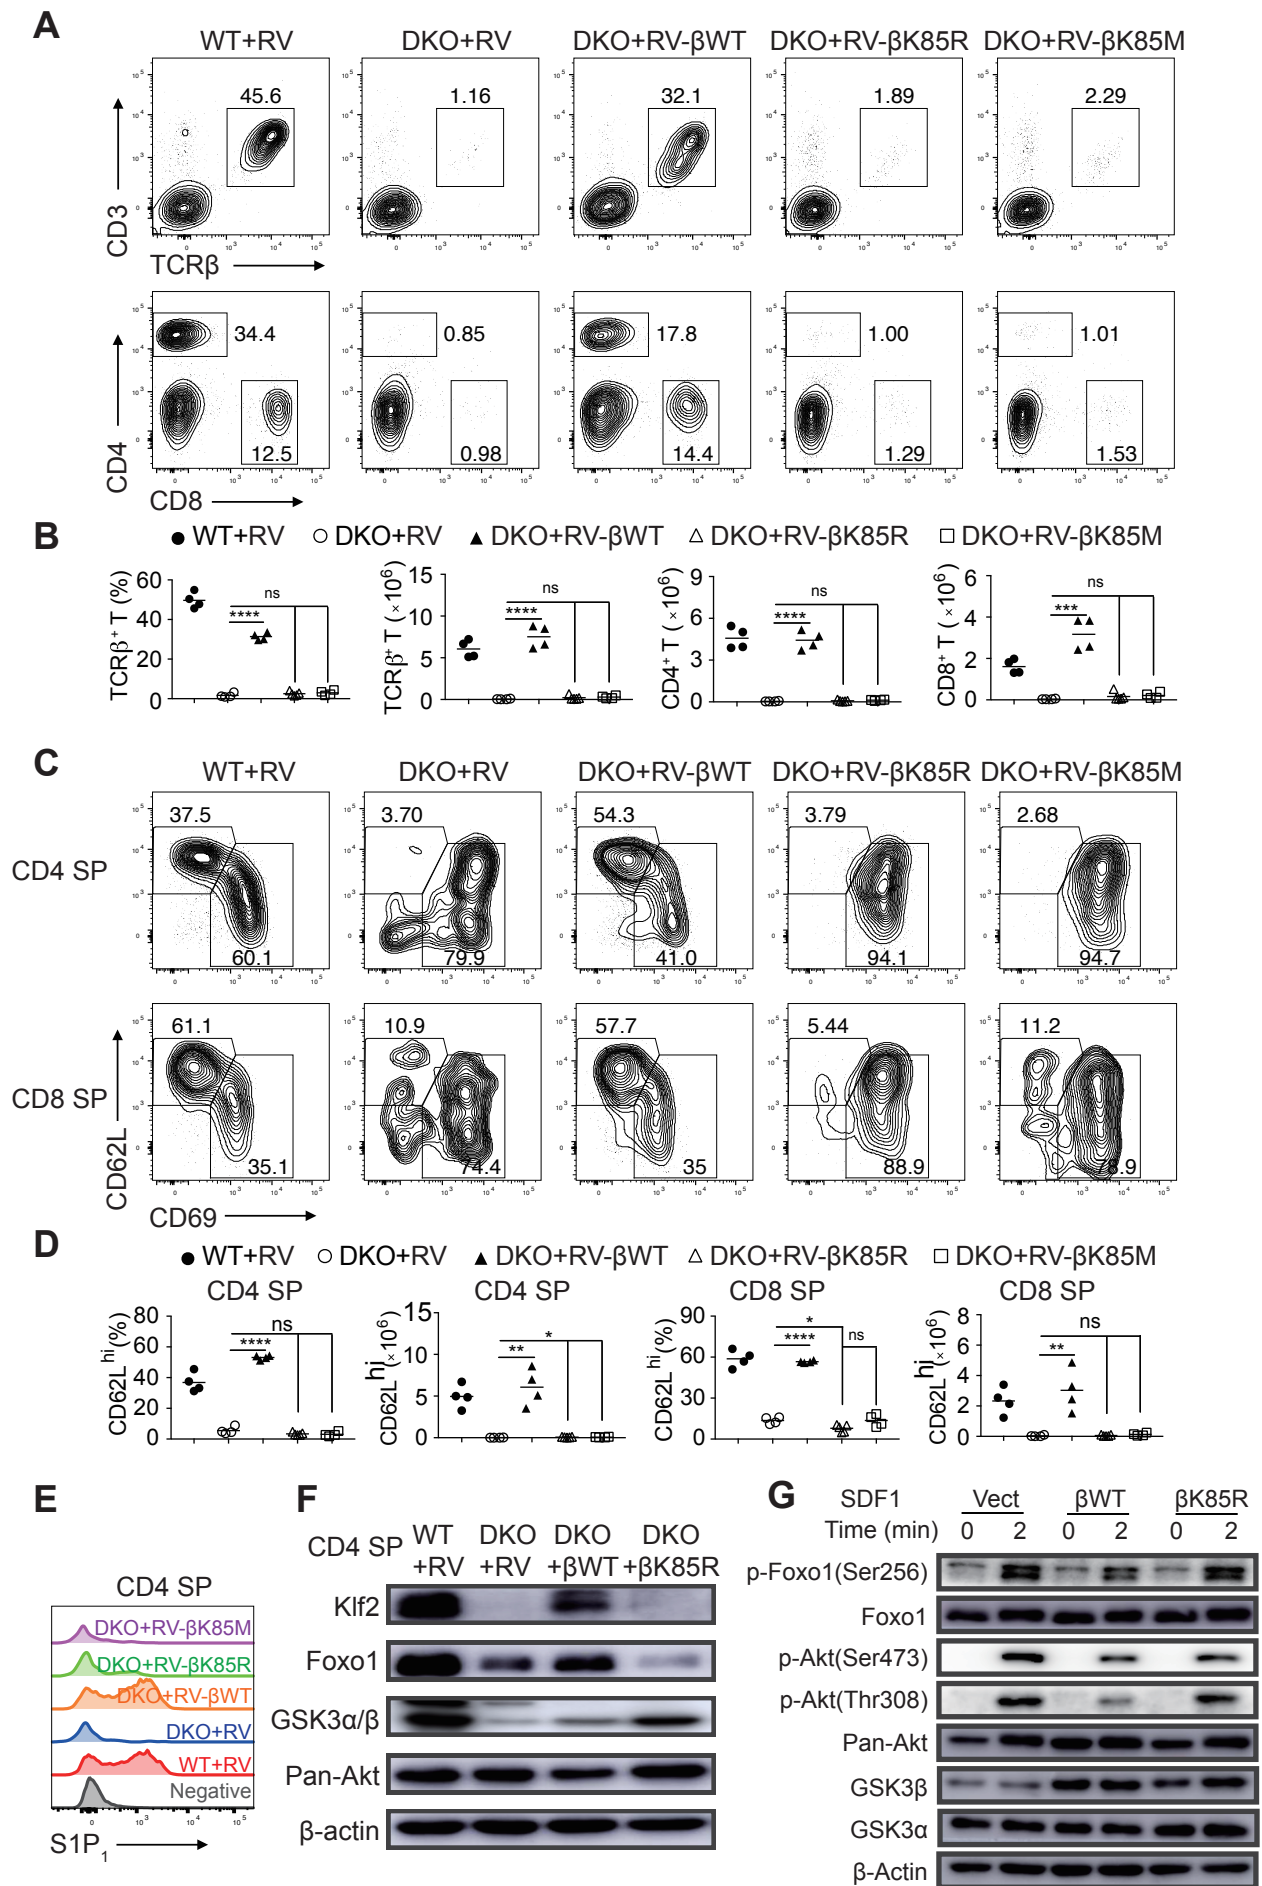

**Fig. S13. Kinase activity of GSK3 is essential for thymocyte egress**

(A) Flow cytometry analysis of CD3<sup>+</sup>TCRβ<sup>+</sup> (upper), CD4<sup>+</sup> and CD8<sup>+</sup> (lower) T cells in the lymph nodes of recipient mice reconstituted with WT and DKO bone marrow cells transduced with empty retroviruses (RV) or retroviruses encoding wild type (RV-βWT) or kinase-dead GSK3β (RV-βK85R and βK85R). (B) Summary of the percentage and number of CD3<sup>+</sup>TCRβ<sup>+</sup> (upper), CD4<sup>+</sup> and CD8<sup>+</sup> T cells (lower) in (A) (n≥4 per group). (C) Flow cytometry analysis of CD62L<sup>hi</sup>CD69<sup>lo</sup> and CD62L<sup>lo</sup>CD69<sup>hi</sup> cells among on CD4 (upper) and CD8 (lower) SP thymocytes in the recipients in (A). (D) Summary of the percentage and number of CD62L<sup>hi</sup>CD69<sup>lo</sup> cells among CD4 and CD8 SP thymocytes in (C). (E) S1P<sub>1</sub> expression on CD62L<sup>hi</sup>CD69<sup>lo</sup> CD4 (upper) and CD8 (lower) SP thymocytes in mice in (A) was analyzed by flow cytometry. CD62L<sup>lo</sup>CD69<sup>hi</sup> cells as a negative control (gray). (F) Immunoblot analysis of CD4 SP thymocytes of indicated groups. (G) Immunoblot analysis of CD4 SP thymocytes transduced with retroviruses encoding βWT or βK85R and stimulated with SDF1 for indicated amounts of time. Each symbol represents an individual mouse. Small horizontal lines indicate the mean (± s.e.m.). \*, P < 0.1; \*\*, P < 0.01; \*\*\*, P < 0.001; \*\*\*\*, P < 0.0001. Data are representative of three independent experiments.

Fig. S14

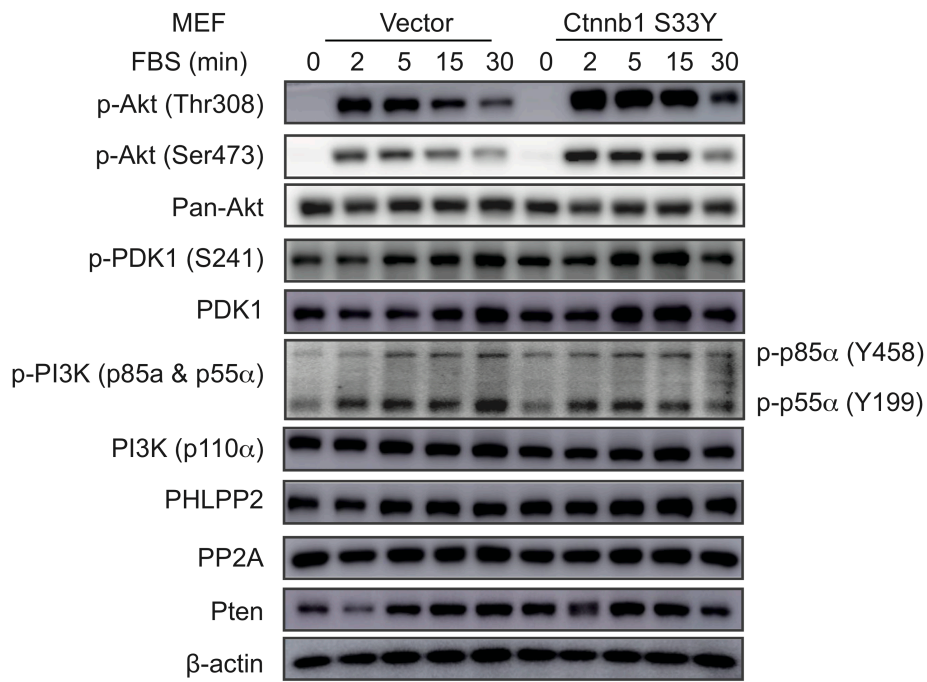

**Fig. S14. Stabilized  $\beta$ -catenin does not affect PI3K and PDK1 activation**

MEFs were transduced with lentiviruses encoding  $\beta$ -catenin S33Y (Ctnnb1 S33Y) or vector, serum starved for 16 hours, and re-stimulated with 0.5% FBS for indicated amounts of time. Total cell lysates were analyzed by immunoblotting with indicated antibodies. Data are representative of two independent experiments.

Fig. S15

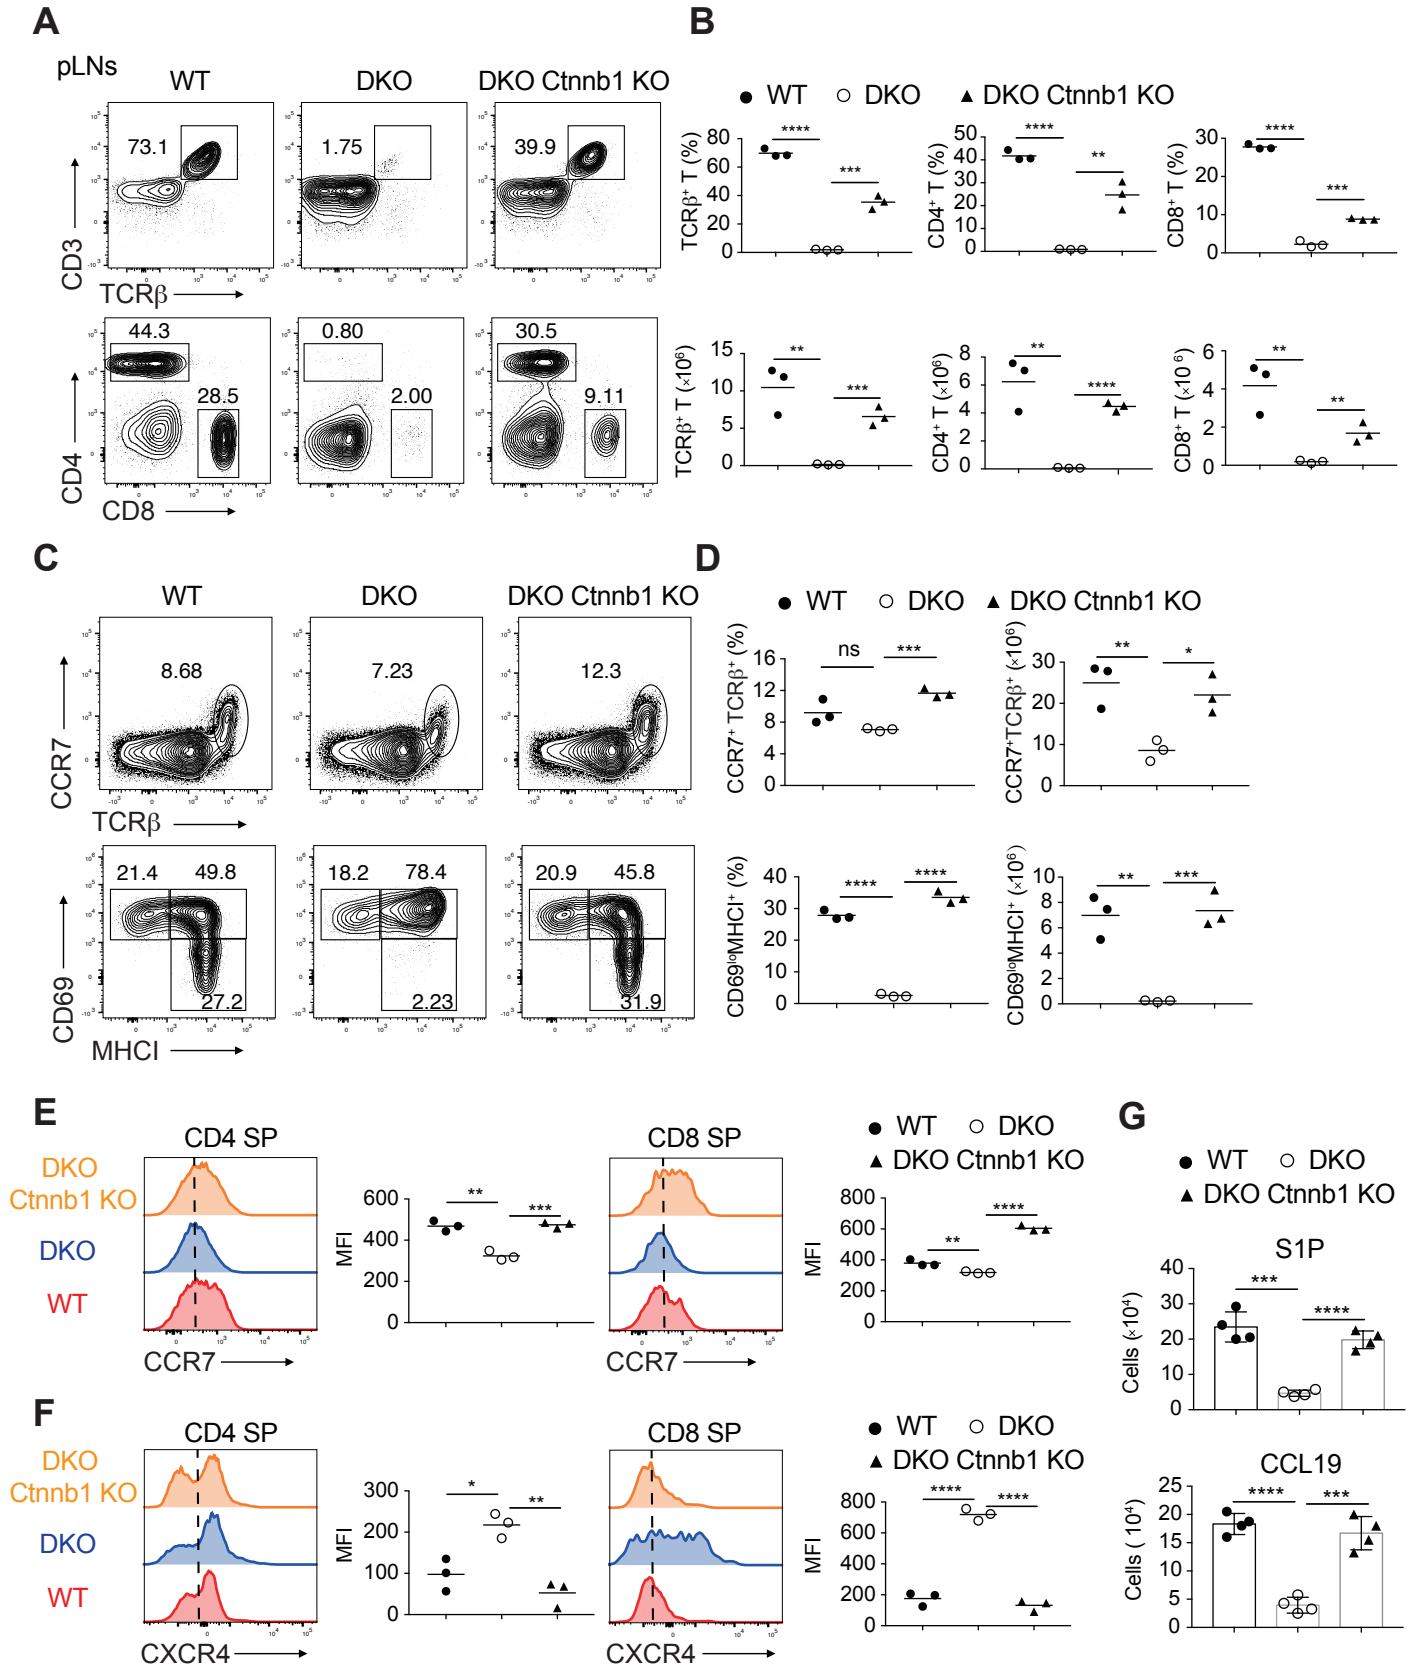

**Fig. S15. *Cttnb1* deletion restores CCR7 and CXCR4 expression and migration of mature *Gsk3*-deficient thymocytes**

(A) Flow cytometry analysis of CD3<sup>+</sup>TCRβ<sup>+</sup> (upper), CD4<sup>+</sup> and CD8<sup>+</sup> T (lower) cells in the lymph nodes of 4-6 week-old WT, DKO and *Gsk3α<sup>-/-</sup>b<sup>-/-</sup>Cttnb1<sup>-/-</sup>* (DKO Cttnb1 KO) mice. (B) Summary of the percentage (upper) and number (lower) of CD3<sup>+</sup>TCRβ<sup>+</sup>, CD4<sup>+</sup> and CD8<sup>+</sup> T cells in (A) (n=3 per group). (C) Flow cytometry analysis of CCR7 and TCRβ expression by total thymocytes from WT, DKO and DKO Cttnb1 KO mice (upper). Post-positive selection thymocytes (CCR7<sup>+</sup>TCRβ<sup>+</sup>) were subsetted into three subpopulations (SM, M1 and M2) based on CD69 and MHC I expression (lower). (D) Summary of the percentage and number of CCR7<sup>+</sup>TCRβ<sup>+</sup> (upper) and CD69<sup>lo</sup>MHCI<sup>+</sup> (lower) cells among CD4 SP cells in (C). (E and F) CCR7 (E) and CXCR4 (F) expression on CD62L<sup>hi</sup>CD69<sup>lo</sup> CD4 (left) and CD8 (right) SP thymocytes in mice in (A) was analyzed by flow cytometry. Right panel, MFI of CCR7 and CXCR4 expression on CD62L<sup>hi</sup>CD69<sup>lo</sup> CD4 SP thymocytes of indicated genotypes. (G) Transwell migration assay of WT, DKO and DKO Cttnb1 KO CD4 SP thymocytes in response to S1P (upper) and CCL19 (lower). Each symbol represents an individual mouse. Small horizontal lines indicate the mean (± s.e.m.). \*, P < 0.1; \*\*, P < 0.01; \*\*\*, P < 0.001; \*\*\*\*, P < 0.0001. Data are representative of three independent experiments.
